# Supplementary material
Source: publisher figshare collection journal article supplement (https://acs.figshare.com/ndownloader/files/17435936)
Supplement: Supplementary file 1 [file 17435936]

## Supporting Information for

### **Ir-Catalyzed Intermolecular Asymmetric Allylic Alkylation of $\beta$ -Tetralones**

Dong-Song Zheng,<sup>†</sup> Zheng-Le Zhao,<sup>†</sup> Qing Gu,\* and Shu-Li You\*

State Key Laboratory of Organometallic Chemistry, Center for Excellence in Molecular Synthesis,  
Shanghai Institute of Organic Chemistry, Chinese Academy of Sciences, 345 Lingling Lu, Shanghai  
200032, China

<sup>†</sup> D.-S.Z. and Z.-L.Z. contributed equally to this work.

E-mail: qinggu@sioc.ac.cn, slyou@sioc.ac.cn

#### **Table of Contents**

|                                               |        |
|-----------------------------------------------|--------|
| General Methods                               | S2     |
| The absolute configuration of <b>5a</b> .     | S2     |
| Copies of NMR Spectra and HPLC Chromatographs | S3-S55 |

**General Methods.** Unless stated otherwise, all reactions were carried out in flame-dried glassware under a dry argon atmosphere. All solvents were purified and dried according to standard methods prior to use.  $^1\text{H}$  and  $^{13}\text{C}$  NMR spectra were recorded on a Varian instrument (300, 400 MHz and 75, 100 MHz, respectively) and internally referenced to tetramethylsilane signal or residual protio solvent signals. Data for  $^1\text{H}$  NMR are recorded as follows: chemical shift ( $\delta$ , ppm), multiplicity (s = singlet, d = doublet, t = triplet, m = multiplet or unresolved, br = broad singlet, coupling constant(s) in Hz, integration). Data for  $^{13}\text{C}$  NMR are reported in terms of chemical shift ( $\delta$ , ppm).

**The absolute configuration of 5a.**

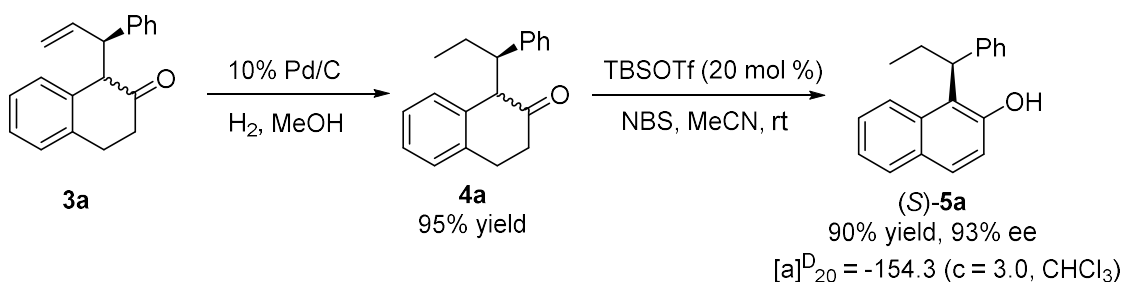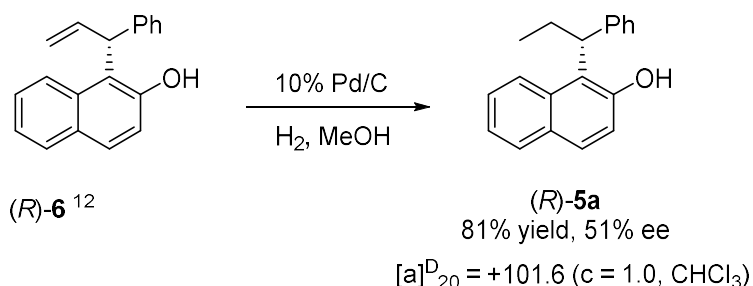

To the known compound (*R*)-**6** (109.0 mg, 0.42 mmol) in methanol (5 mL) was added 10% Pd/C (45.0 mg) and then the reaction flask was charged with 1 atm of hydrogen. The reaction mixture was stirred at room temperature until the starting material disappeared (monitored by TLC). The crude reaction mixture was filtrated with celite and washed with EtOAc, the solvents were removed under reduced pressure. Then the residue was purified by silica gel column chromatography (PE/EtOAc = 20/1 to 10/1) to afford the hydrogenated products (87.8 mg, 81% yield).  $[\alpha]_{\text{D}}^{20} = +101.6$  ( $c = 1.0$ ,  $\text{CHCl}_3$ ).

# Copies of NMR Spectra and HPLC Chromatographs

## <sup>1</sup>H NMR Spectra of **3aa**

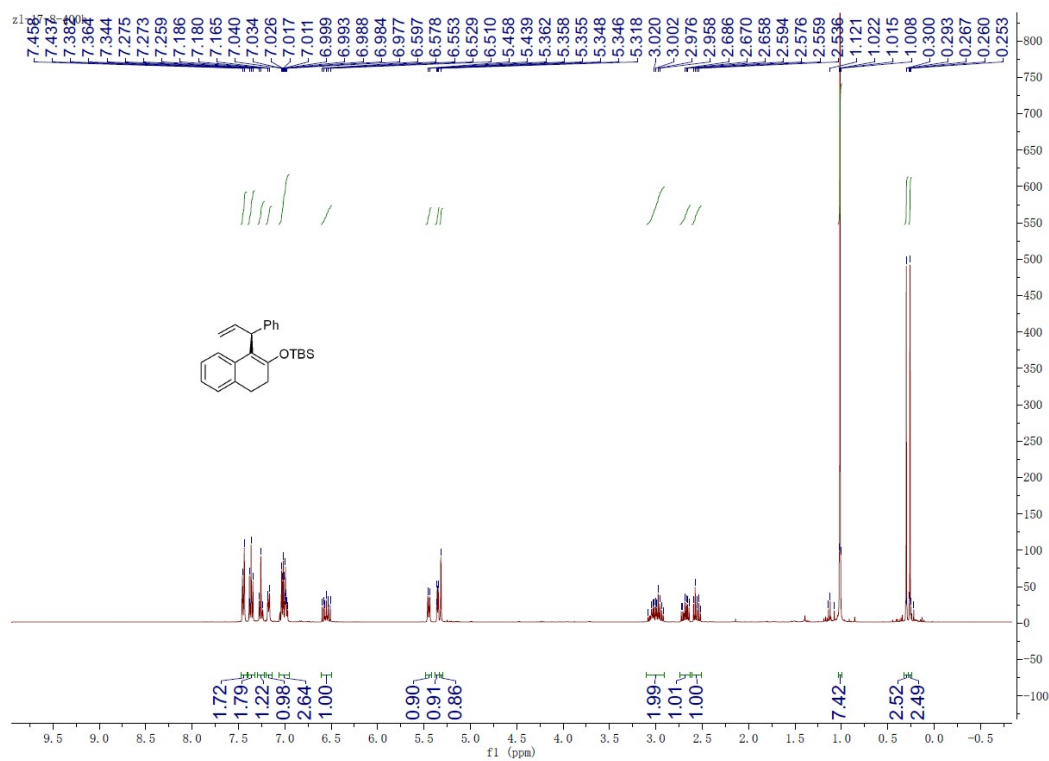

## <sup>13</sup>C NMR Spectra of **3aa**

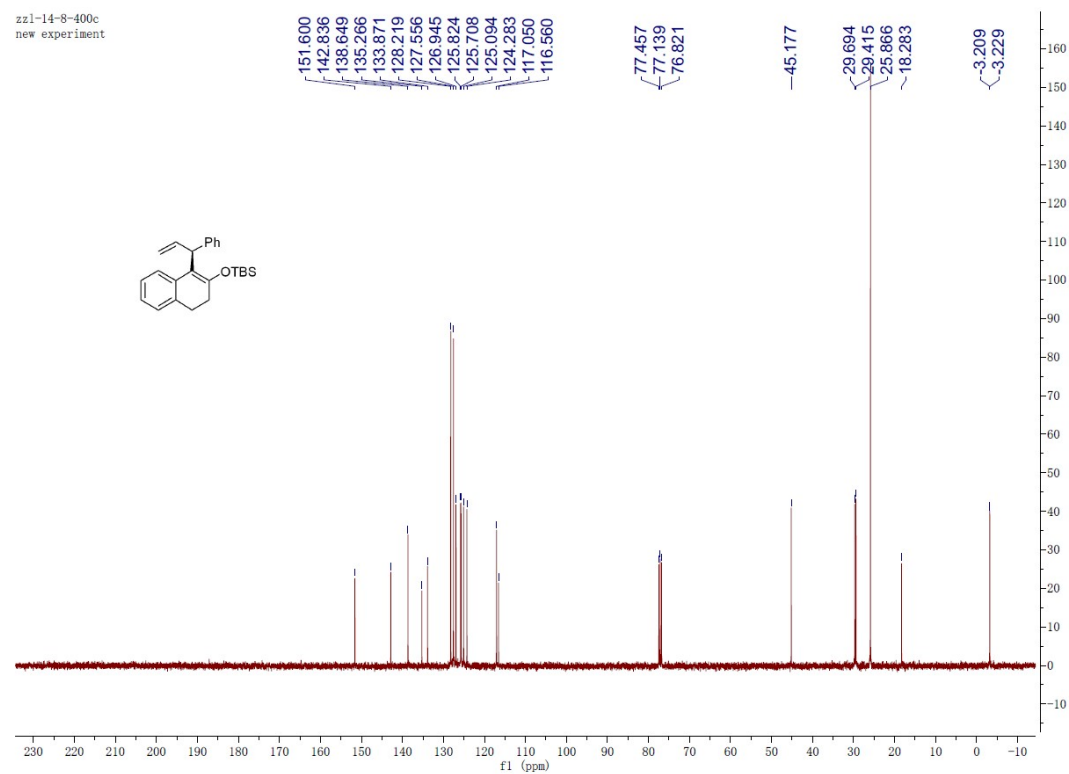

# HPLC Chromatograph of 3aa

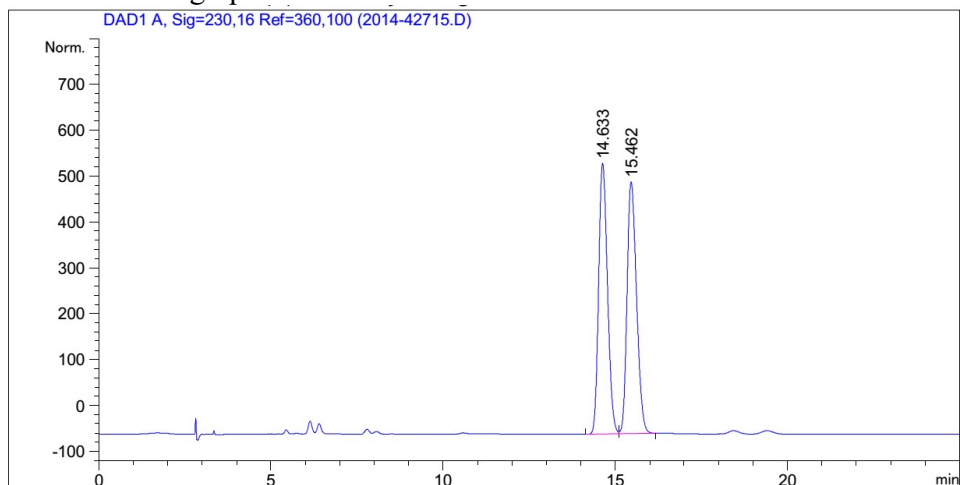

## Area Percent Report

Sorted By : Signal  
Multiplier : 1.0000  
Dilution : 1.0000  
Do not use Multiplier & Dilution Factor with ISTDs

Signal 1: DAD1 A, Sig=230,16 Ref=360,100

| Peak # | RetTime [min] | Type | Width [min] | Area [mAU*s] | Height [mAU] | Area %  |
|--------|---------------|------|-------------|--------------|--------------|---------|
| 1      | 14.633        | BV   | 0.2763      | 8375.16602   | 469.18622    | 50.0585 |
| 2      | 15.462        | VB   | 0.2975      | 8355.59863   | 436.12189    | 49.9415 |

Totals : 1.67308e4 905.30811



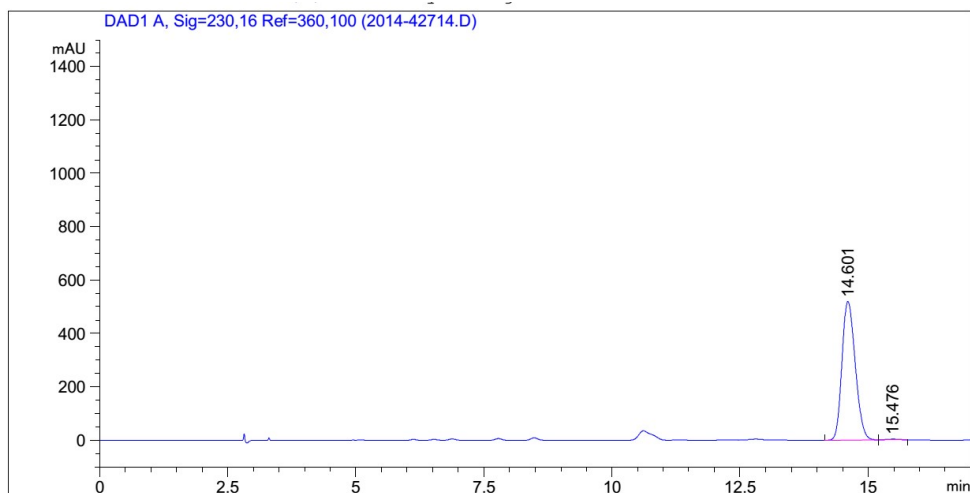

=====  
Area Percent Report  
=====

Sorted By : Signal  
Multiplier : 1.0000  
Dilution : 1.0000  
Do not use Multiplier & Dilution Factor with ISTDs

Signal 1: DAD1 A, Sig=230,16 Ref=360,100

| Peak # | RetTime [min] | Type | Width [min] | Area [mAU*s] | Height [mAU] | Area %  |
|--------|---------------|------|-------------|--------------|--------------|---------|
| 1      | 14.601        | BV   | 0.2835      | 9377.35547   | 519.82245    | 99.3670 |
| 2      | 15.476        | VV   | 0.2172      | 59.73365     | 3.33096      | 0.6330  |

Totals : 9437.08912 523.15340

### <sup>1</sup>H NMR Spectra of **3ab**

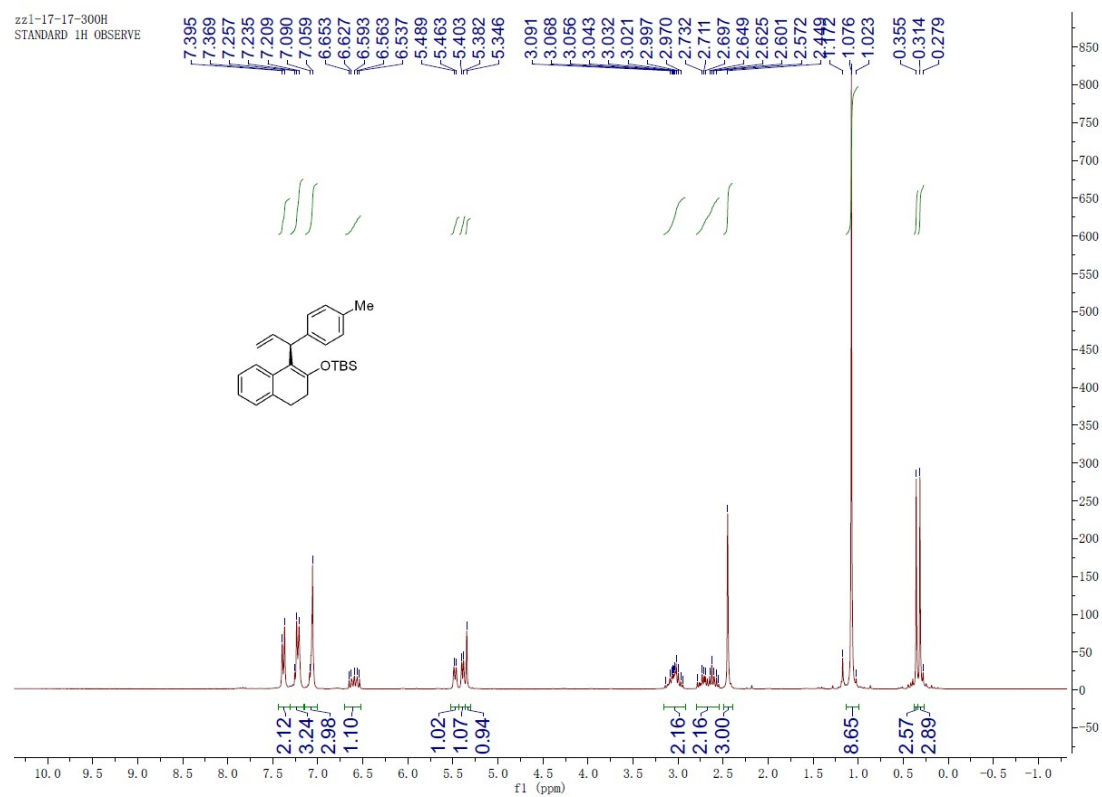

### <sup>13</sup>C NMR Spectra of **3ab**

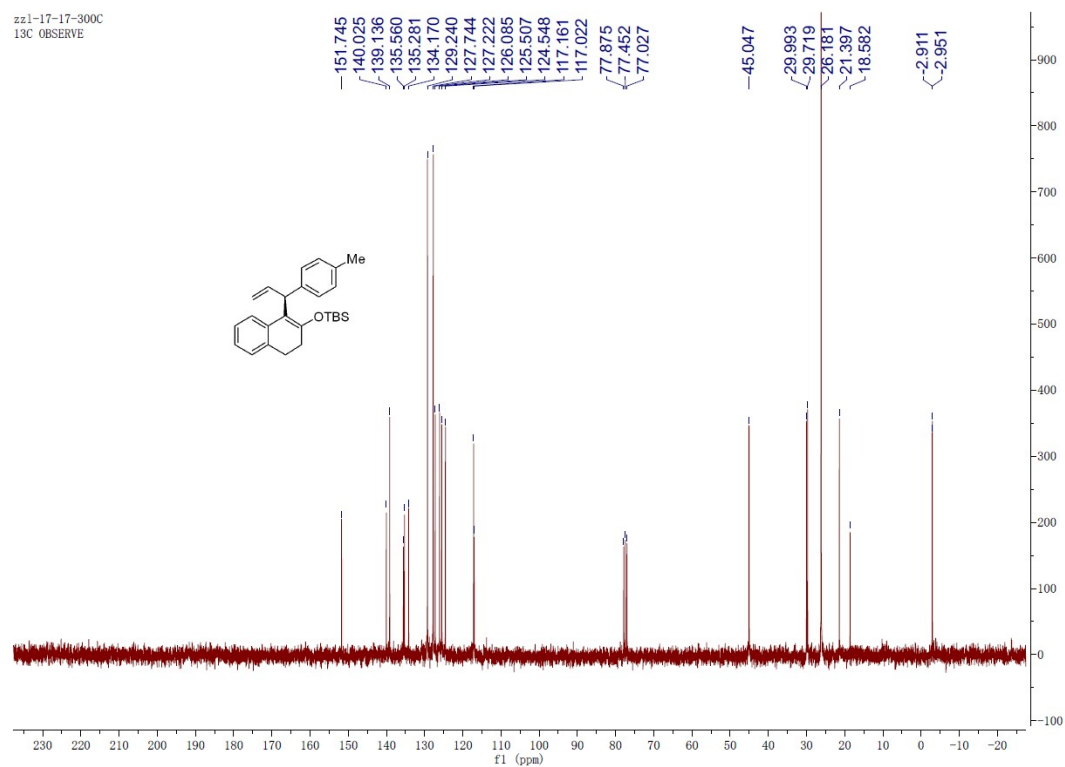

# HPLC Chromatograph of 3ab

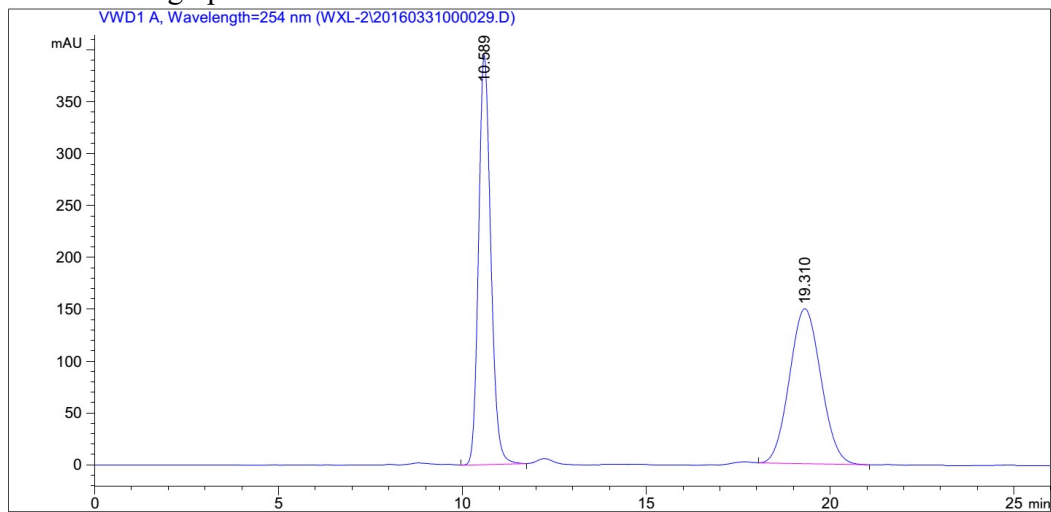

## Area Percent Report

Sorted By : Signal  
Multiplier: : 1.0000  
Dilution: : 1.0000  
Use Multiplier & Dilution Factor with ISTDs

Signal 1: VWD1 A, Wavelength=254 nm

| Peak # | RetTime [min] | Type | Width [min] | Area [mAU*s] | Height [mAU] | Area %  |
|--------|---------------|------|-------------|--------------|--------------|---------|
| 1      | 10.589        | MM   | 0.3844      | 9103.72754   | 394.74692    | 50.6293 |
| 2      | 19.310        | MM   | 0.9907      | 8877.43164   | 149.33922    | 49.3707 |

Totals : 1.79812e4 544.08614

\*\*\* End of Report \*\*\*

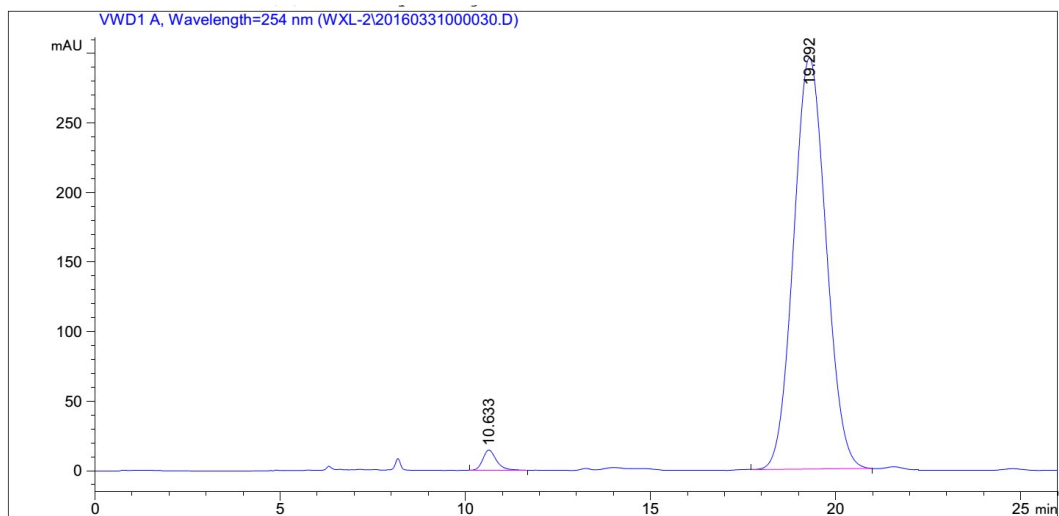

=====  
Area Percent Report  
=====

Sorted By : Signal  
Multiplier: : 1.0000  
Dilution: : 1.0000  
Use Multiplier & Dilution Factor with ISTDs

Signal 1: VWD1 A, Wavelength=254 nm

| Peak # | RetTime [min] | Type | Width [min] | Area [mAU*s] | Height [mAU] | Area %  |
|--------|---------------|------|-------------|--------------|--------------|---------|
| 1      | 10.633        | MM   | 0.4231      | 368.35361    | 14.50904     | 2.0014  |
| 2      | 19.292        | MM   | 1.0166      | 1.80364e4    | 295.71127    | 97.9986 |

Totals : 1.84047e4 310.22031

=====  
\*\*\* End of Report \*\*\*

# <sup>1</sup>H NMR Spectra of **3ac**

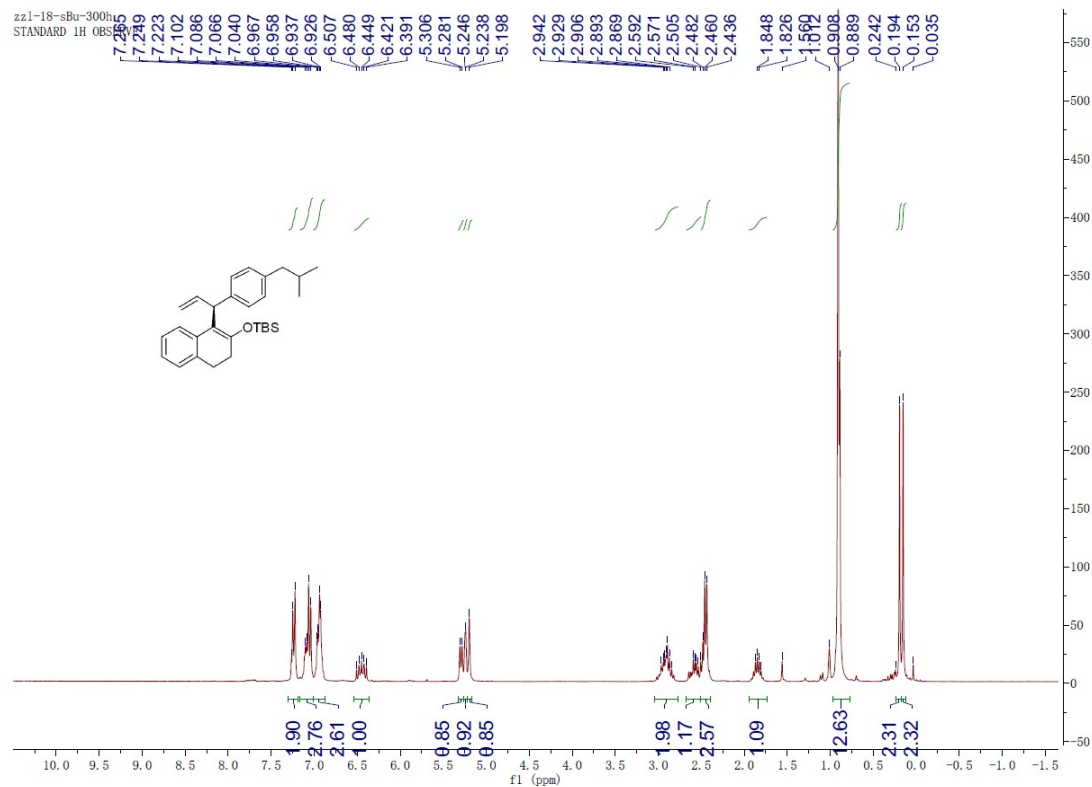

# <sup>13</sup>C NMR Spectra of **3ac**

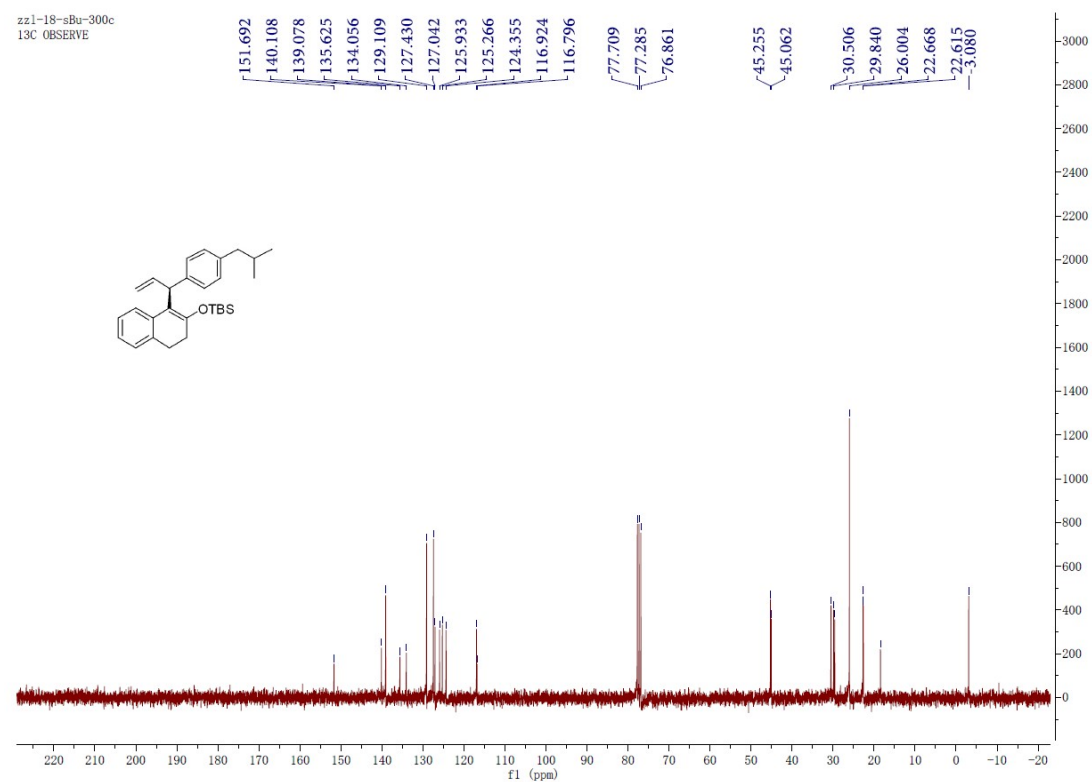

# HPLC Chromatograph of 3ac

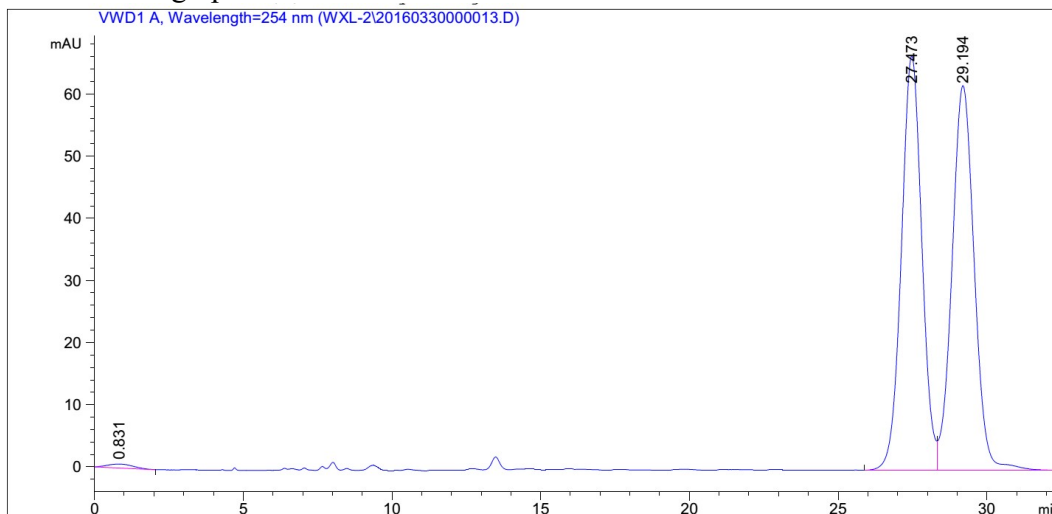

## Area Percent Report

Sorted By : Signal  
Multiplier: : 1.0000  
Dilution: : 1.0000  
Use Multiplier & Dilution Factor with ISTDs

Signal 1: VWD1 A, Wavelength=254 nm

| Peak # | RetTime [min] | Type | Width [min] | Area [mAU*s] | Height [mAU] | Area %  |
|--------|---------------|------|-------------|--------------|--------------|---------|
| 1      | 0.831         | BB   | 0.6912      | 37.95265     | 6.48108e-1   | 0.5908  |
| 2      | 27.473        | BV   | 0.7400      | 3175.83008   | 66.63687     | 49.4357 |
| 3      | 29.194        | VBA  | 0.7994      | 3210.38354   | 61.86399     | 49.9735 |

Totals : 6424.16627 129.14897

\*\*\* End of Report \*\*\*

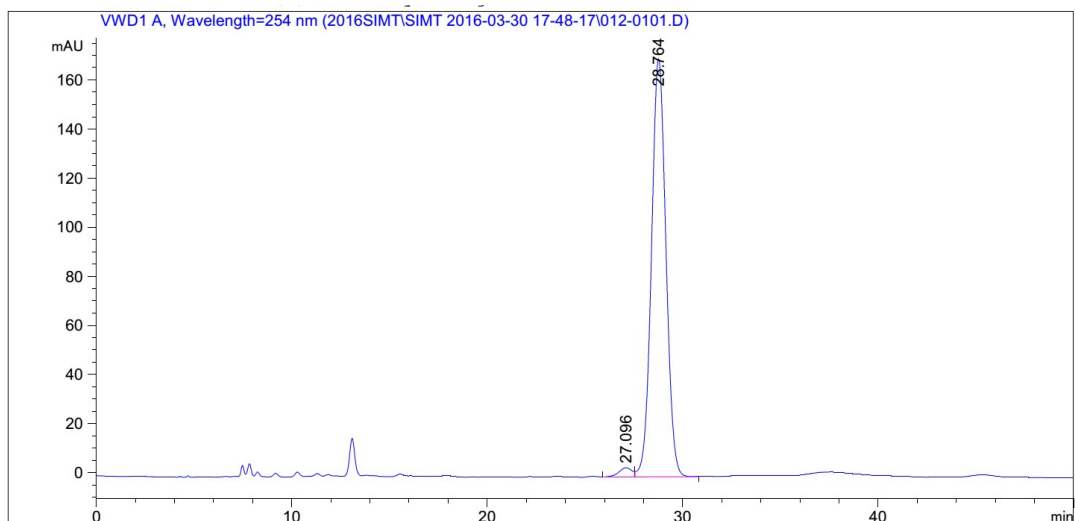

=====  
Area Percent Report  
=====

Sorted By : Signal  
Multiplier: : 1.0000  
Dilution: : 1.0000  
Use Multiplier & Dilution Factor with ISTDs

Signal 1: VWD1 A, Wavelength=254 nm

| Peak # | RetTime [min] | Type | Width [min] | Area [mAU*s] | Height [mAU] | Area %  |
|--------|---------------|------|-------------|--------------|--------------|---------|
| 1      | 27.096        | BV   | 0.7021      | 175.10590    | 3.71368      | 1.9619  |
| 2      | 28.764        | VB   | 0.7996      | 8750.02637   | 170.25859    | 98.0381 |

Totals : 8925.13226 173.97227

=====  
\*\*\* End of Report \*\*\*

# <sup>1</sup>H NMR Spectra of **3ad**

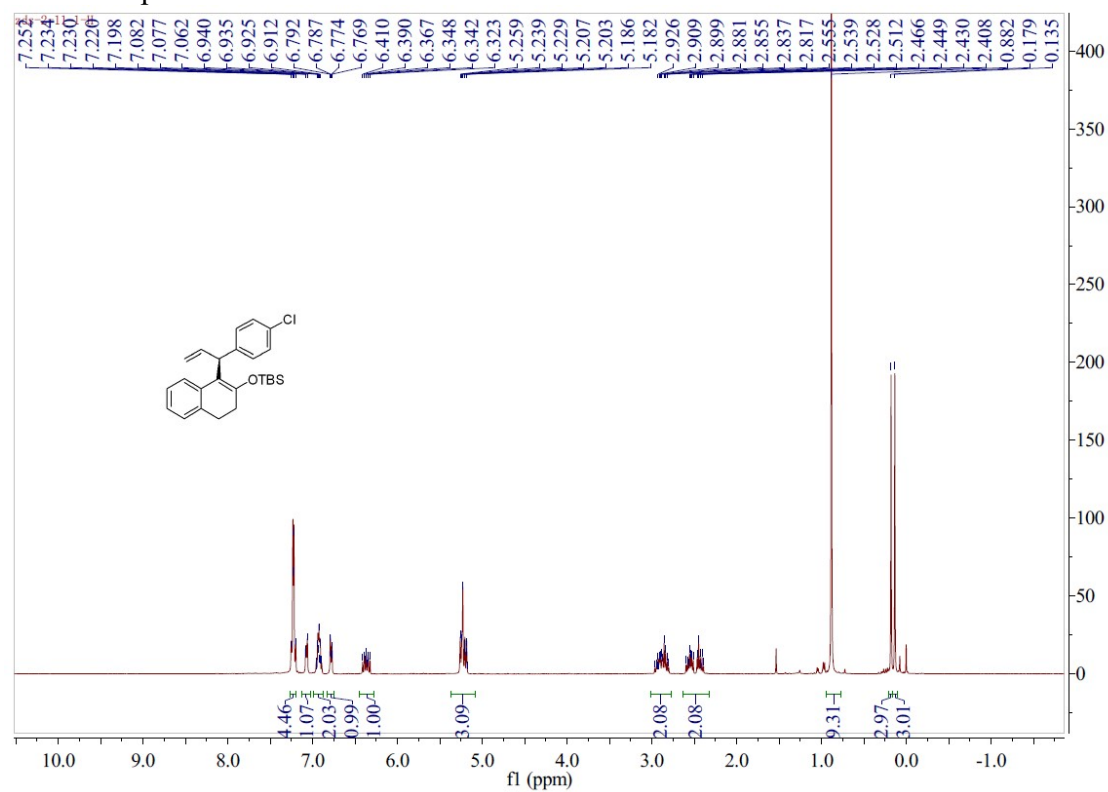

# <sup>13</sup>C NMR Spectra of **3ad**

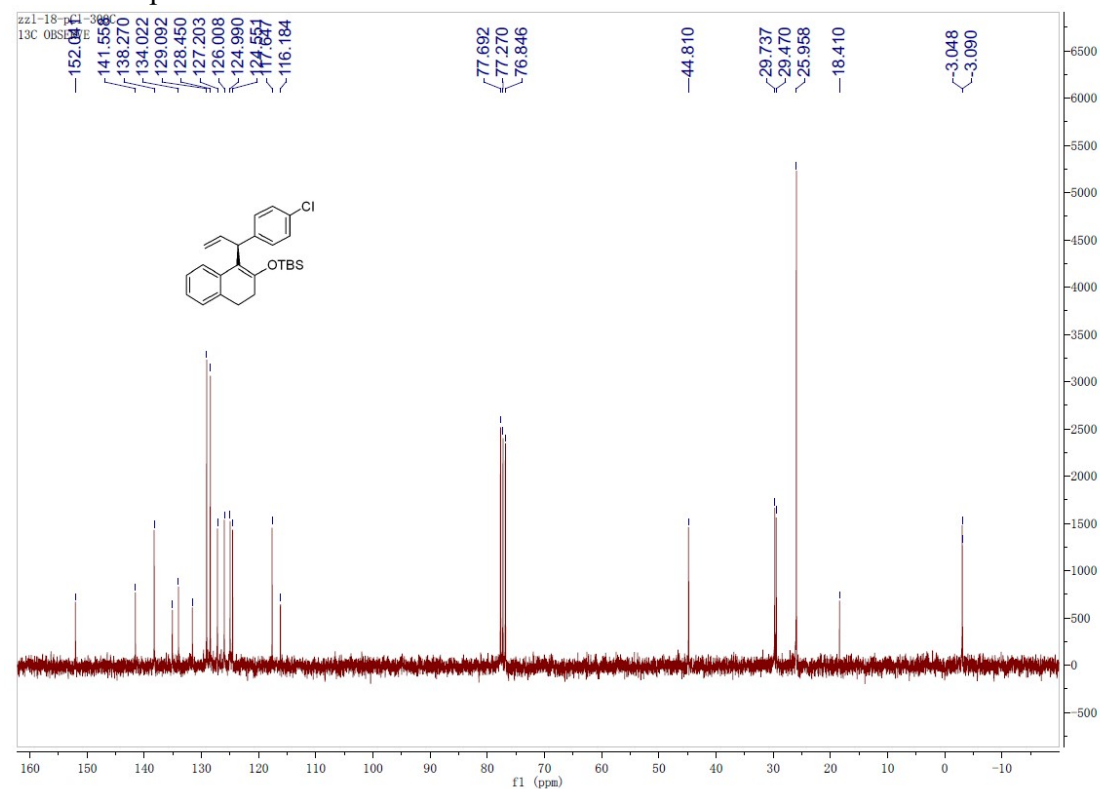



# HPLC Chromatograph of 3ad

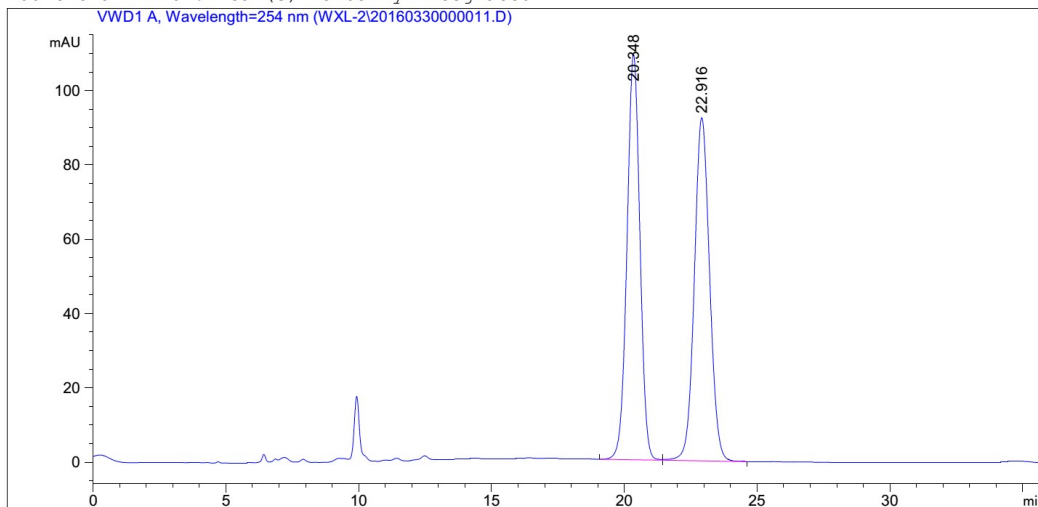

## Area Percent Report

Sorted By : Signal  
Multiplier: : 1.0000  
Dilution: : 1.0000  
Use Multiplier & Dilution Factor with ISTDs

Signal 1: VWD1 A, Wavelength=254 nm

| Peak # | RetTime [min] | Type | Width [min] | Area [mAU*s] | Height [mAU] | Area %  |
|--------|---------------|------|-------------|--------------|--------------|---------|
| 1      | 20.348        | BV   | 0.5246      | 3689.66162   | 109.08865    | 50.0424 |
| 2      | 22.916        | VB   | 0.6173      | 3683.40356   | 92.36255     | 49.9576 |

Totals : 7373.06519 201.45120

\*\*\* End of Report \*\*\*

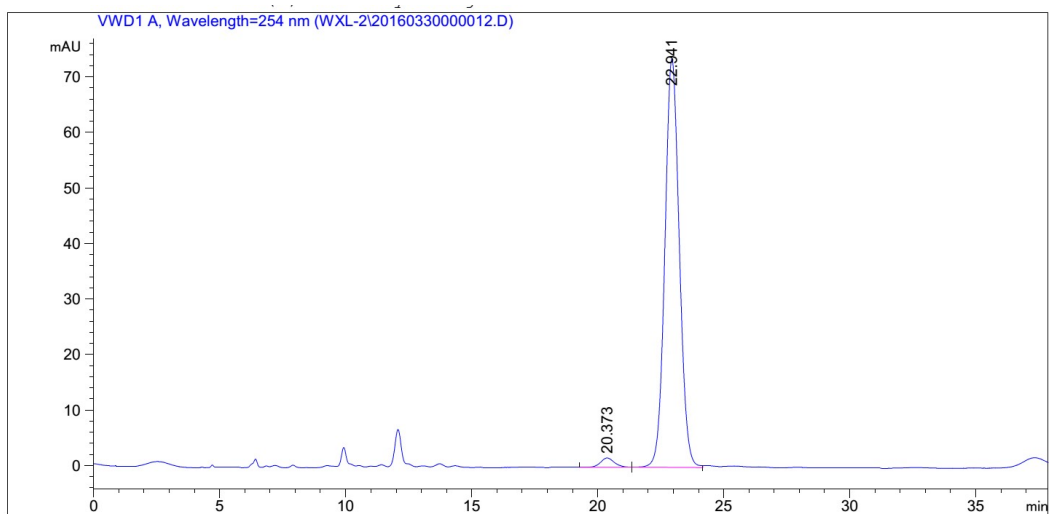

=====  
Area Percent Report  
=====

Sorted By : Signal  
Multiplier: : 1.0000  
Dilution: : 1.0000  
Use Multiplier & Dilution Factor with ISTDs

Signal 1: VWD1 A, Wavelength=254 nm

| Peak # | RetTime [min] | Type | Width [min] | Area [mAU*s] | Height [mAU] | Area %  |
|--------|---------------|------|-------------|--------------|--------------|---------|
| 1      | 20.373        | BB   | 0.5737      | 63.56663     | 1.67125      | 2.1228  |
| 2      | 22.941        | BV   | 0.6168      | 2930.89355   | 73.56261     | 97.8772 |

Totals : 2994.46018 75.23386

=====  
\*\*\* End of Report \*\*\*

# <sup>1</sup>H NMR Spectra of **3ae**

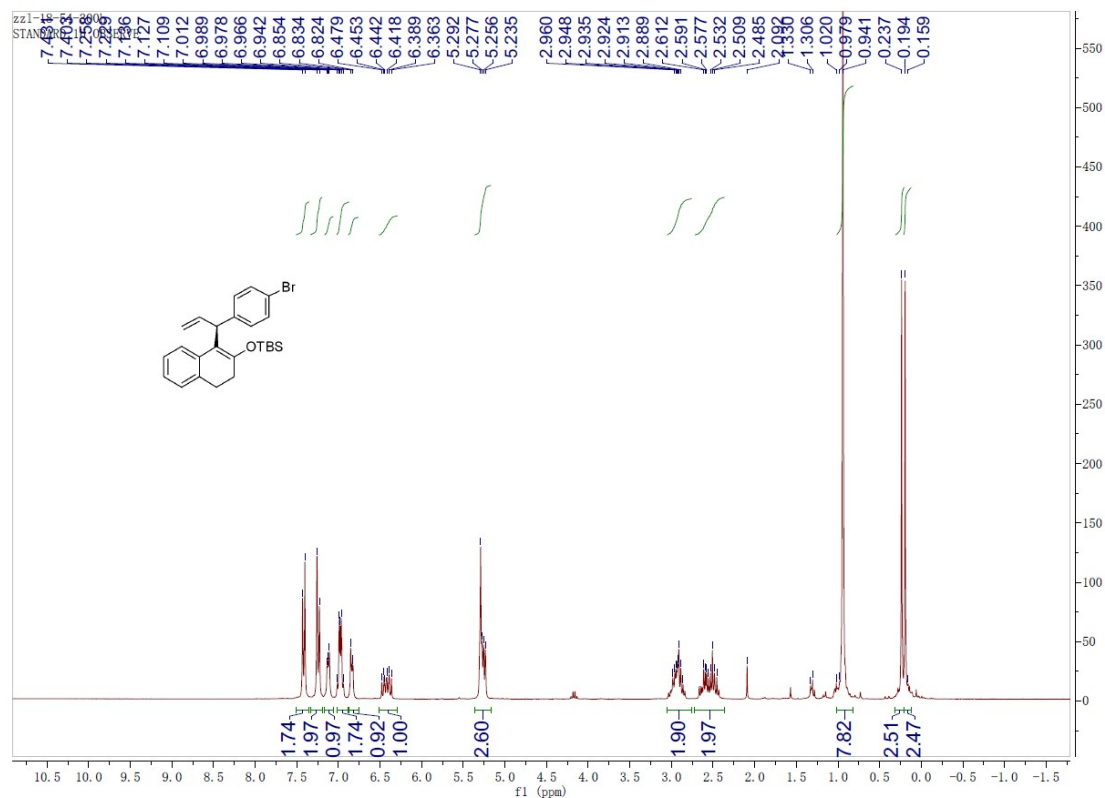

# <sup>13</sup>C NMR Spectra of **3ae**

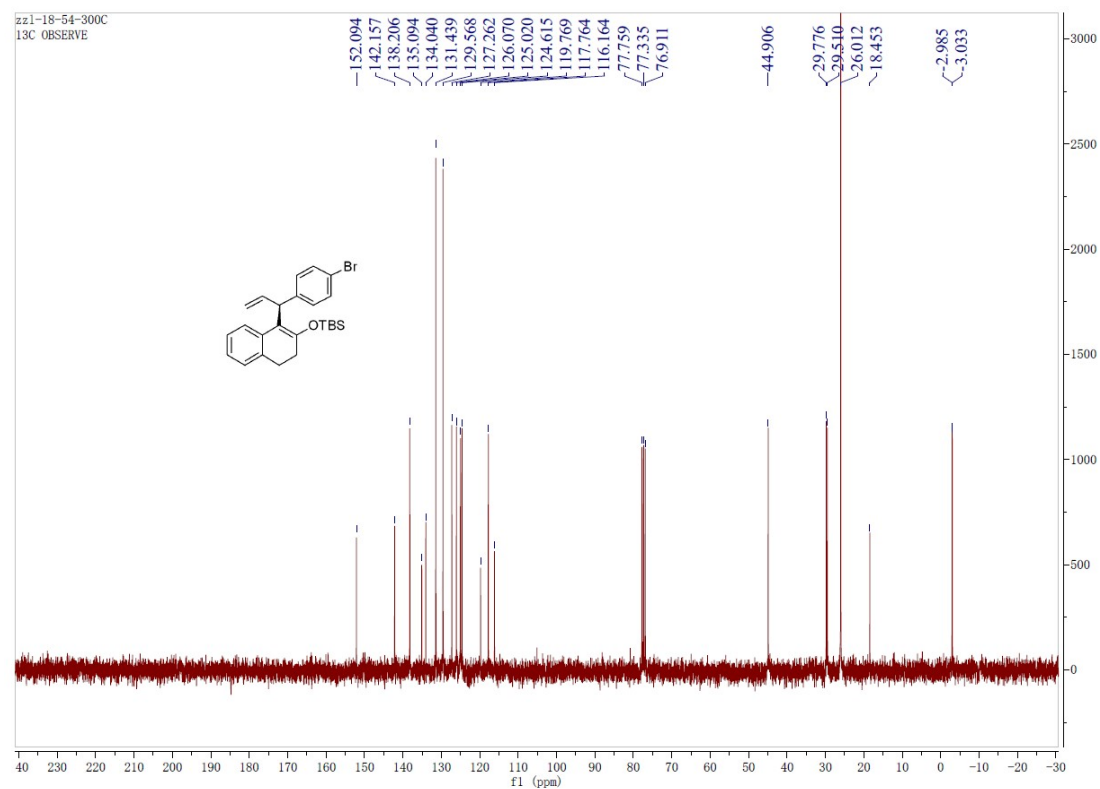

# HPLC Chromatograph of 3ae

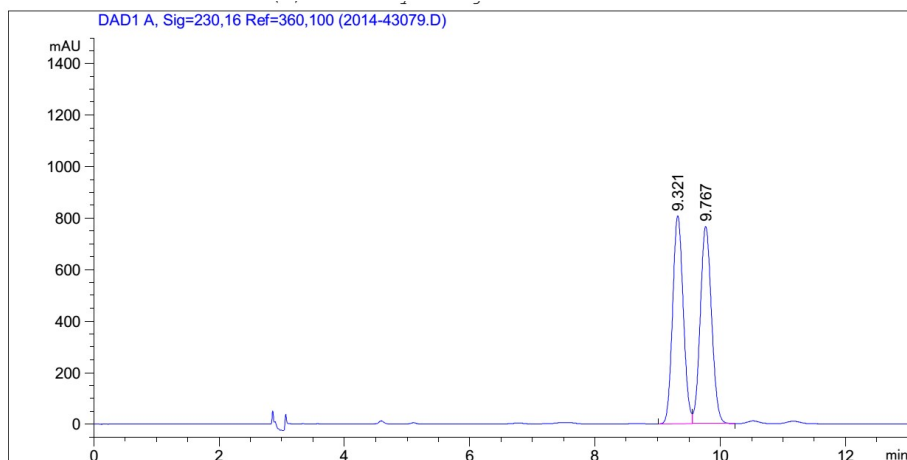

## Area Percent Report

Sorted By : Signal  
Multiplier : 1.0000  
Dilution : 1.0000  
Do not use Multiplier & Dilution Factor with ISTDs

Signal 1: DAD1 A, Sig=230,16 Ref=360,100

| Peak # | RetTime [min] | Type | Width [min] | Area [mAU*s] | Height [mAU] | Area %  |
|--------|---------------|------|-------------|--------------|--------------|---------|
| 1      | 9.321         | BV   | 0.1866      | 9535.45703   | 808.42139    | 49.7545 |
| 2      | 9.767         | VB   | 0.1966      | 9629.57227   | 766.41718    | 50.2455 |

Totals : 1.91650e4 1574.83856

\*\*\* End of Report \*\*\*

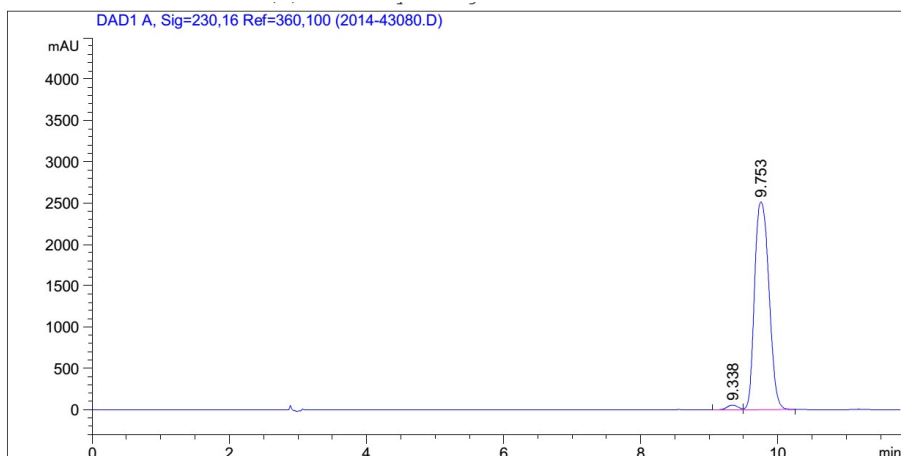

=====  
Area Percent Report  
=====

Sorted By : Signal  
Multiplier : 1.0000  
Dilution : 1.0000  
Do not use Multiplier & Dilution Factor with ISTDs

Signal 1: DAD1 A, Sig=230,16 Ref=360,100

| Peak # | RetTime [min] | Type | Width [min] | Area [mAU*s] | Height [mAU] | Area %  |
|--------|---------------|------|-------------|--------------|--------------|---------|
| 1      | 9.338         | MF R | 0.1814      | 655.79309    | 58.83617     | 1.7586  |
| 2      | 9.753         | FM R | 0.2425      | 3.66343e4    | 2513.06714   | 98.2414 |

Totals : 3.72900e4 2571.90331

=====  
\*\*\* End of Report \*\*\*

# <sup>1</sup>H NMR Spectra of **3af**

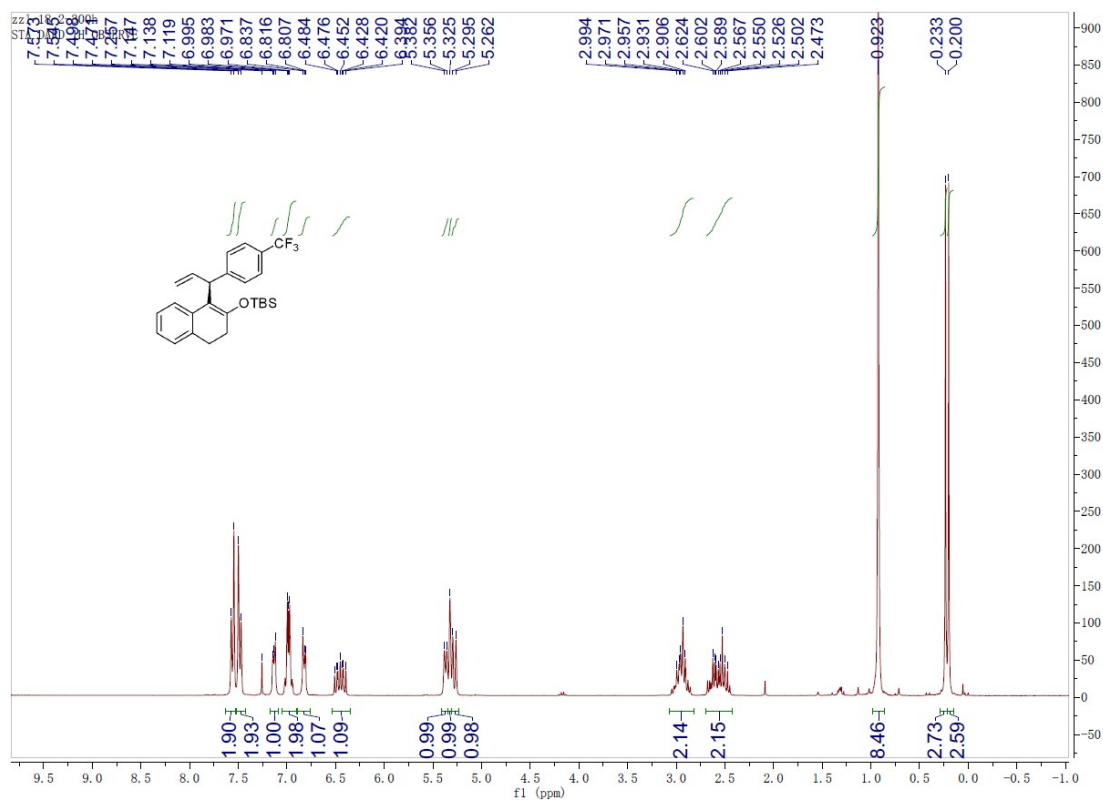

# <sup>13</sup>C NMR Spectra of **3af**

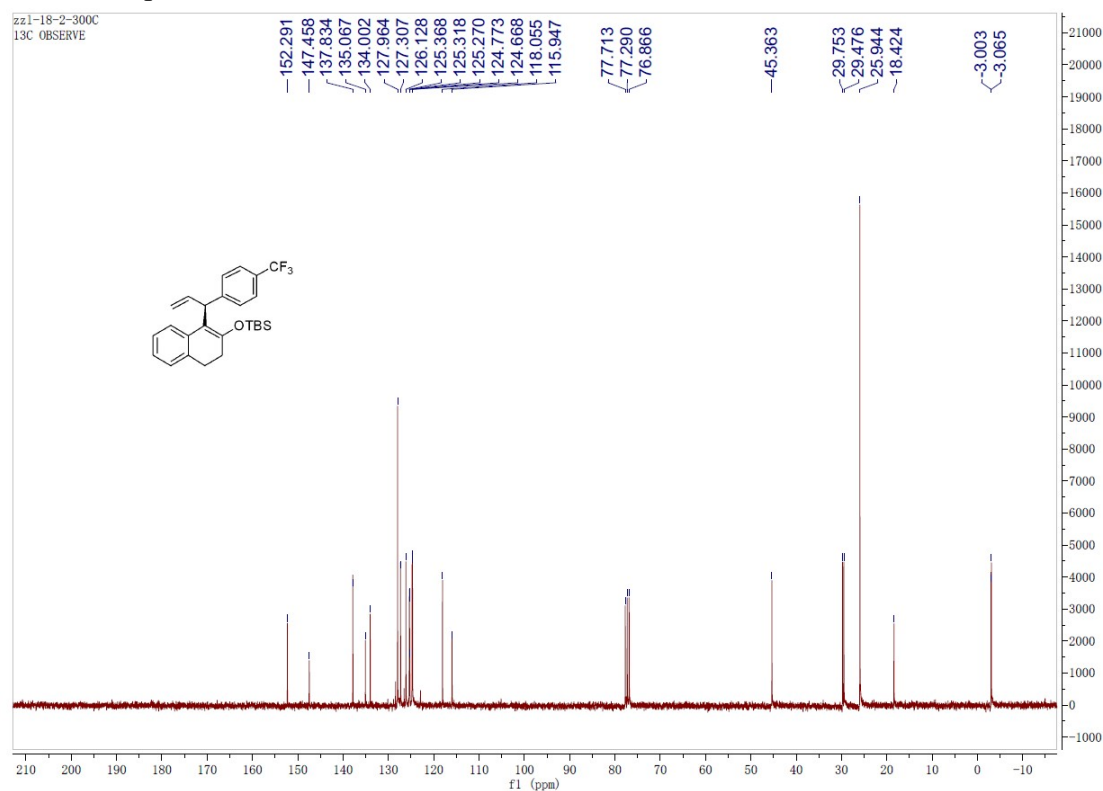

### <sup>19</sup>F NMR Spectra of **3af**

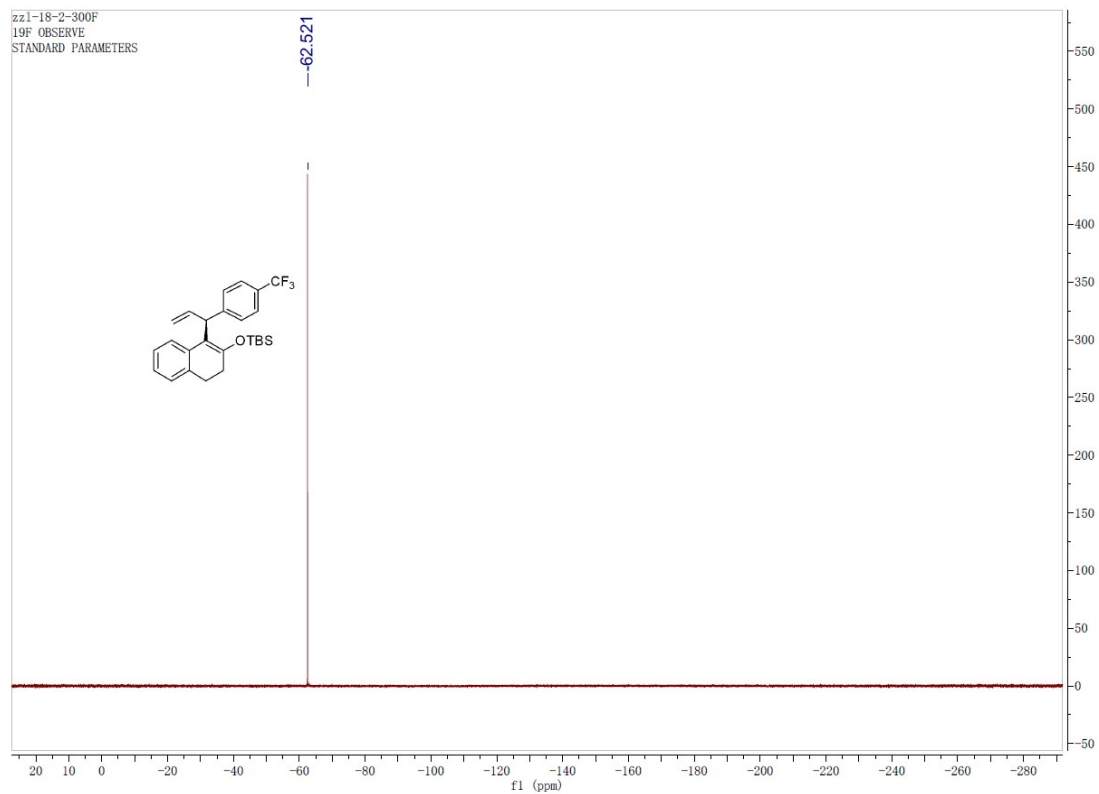

# HPLC Chromatograph of 3af

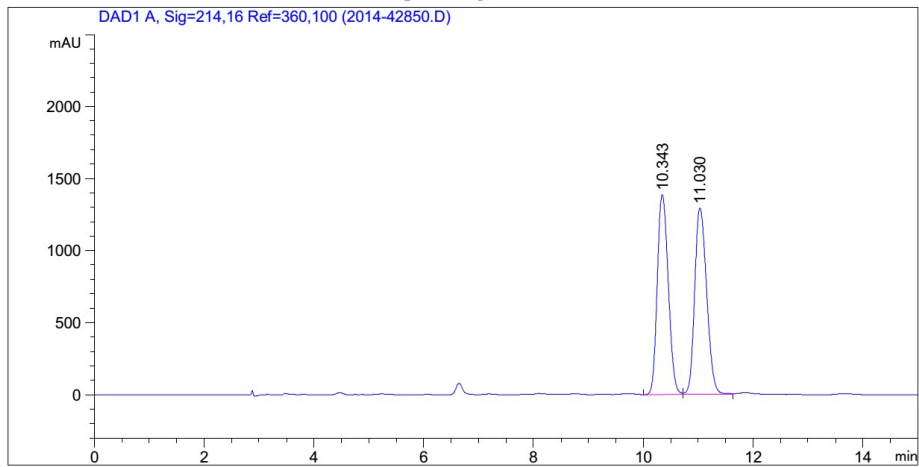

## Area Percent Report

Sorted By : Signal  
Multiplier : 1.0000  
Dilution : 1.0000  
Do not use Multiplier & Dilution Factor with ISTDs

Signal 1: DAD1 A, Sig=214,16 Ref=360,100

| Peak # | RetTime [min] | Type | Width [min] | Area [mAU*s] | Height [mAU] | Area %  |
|--------|---------------|------|-------------|--------------|--------------|---------|
| 1      | 10.343        | BV   | 0.2203      | 1.92895e4    | 1386.64038   | 49.5342 |
| 2      | 11.030        | VV   | 0.2382      | 1.96523e4    | 1293.61340   | 50.4658 |

Totals : 3.89418e4 2680.25378

\*\*\* End of Report \*\*\*



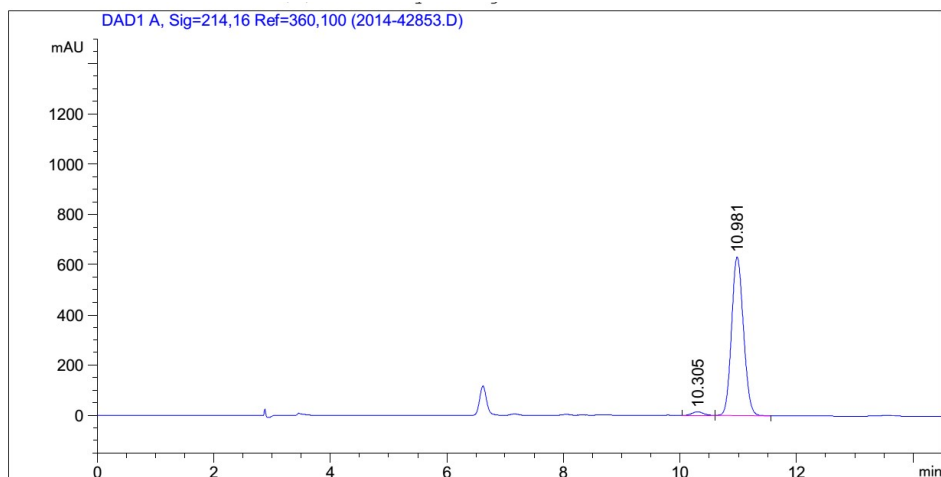

=====  
Area Percent Report  
=====

Sorted By : Signal  
Multiplier : 1.0000  
Dilution : 1.0000  
Do not use Multiplier & Dilution Factor with ISTDs

Signal 1: DAD1 A, Sig=214,16 Ref=360,100

| Peak # | RetTime [min] | Type | Width [min] | Area [mAU*s] | Height [mAU] | Area %  |
|--------|---------------|------|-------------|--------------|--------------|---------|
| 1      | 10.305        | BV   | 0.1956      | 202.79329    | 14.82381     | 2.2024  |
| 2      | 10.981        | VB   | 0.2223      | 9005.09375   | 631.86334    | 97.7976 |

Totals : 9207.88704 646.68715

=====  
\*\*\* End of Report \*\*\*

# <sup>1</sup>H NMR Spectra of **3ag**

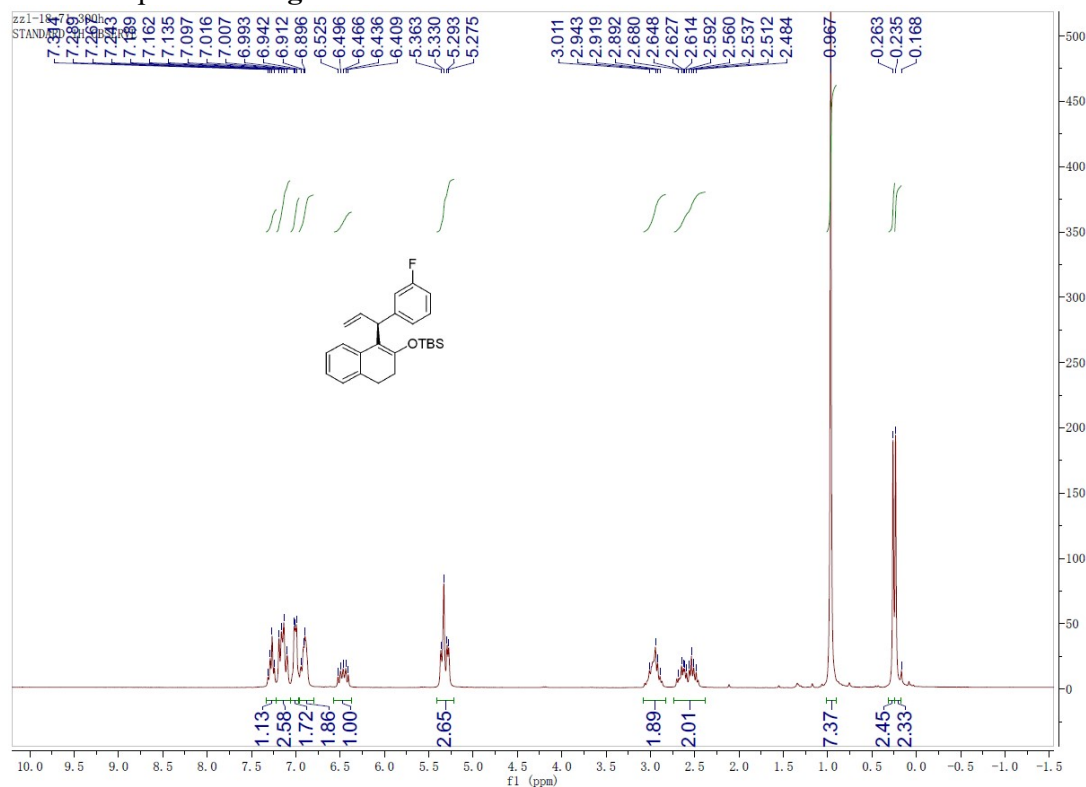

# <sup>13</sup>C NMR Spectra of **3ag**

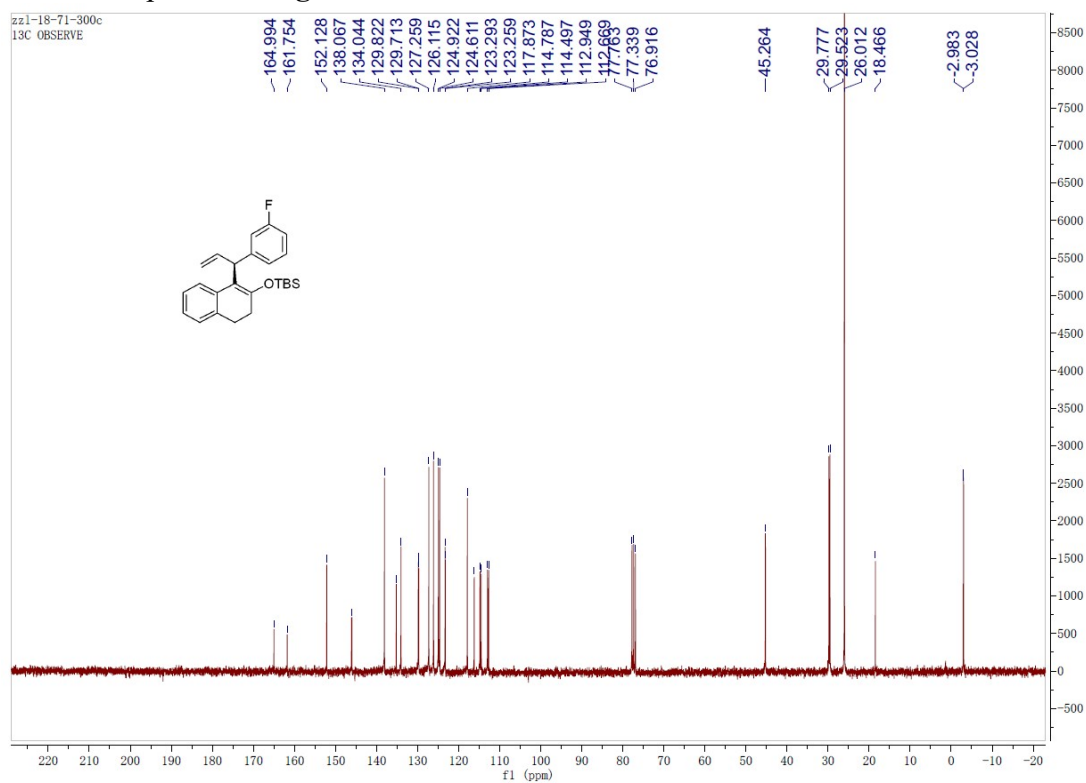

# <sup>19</sup>F NMR Spectra of **3ag**

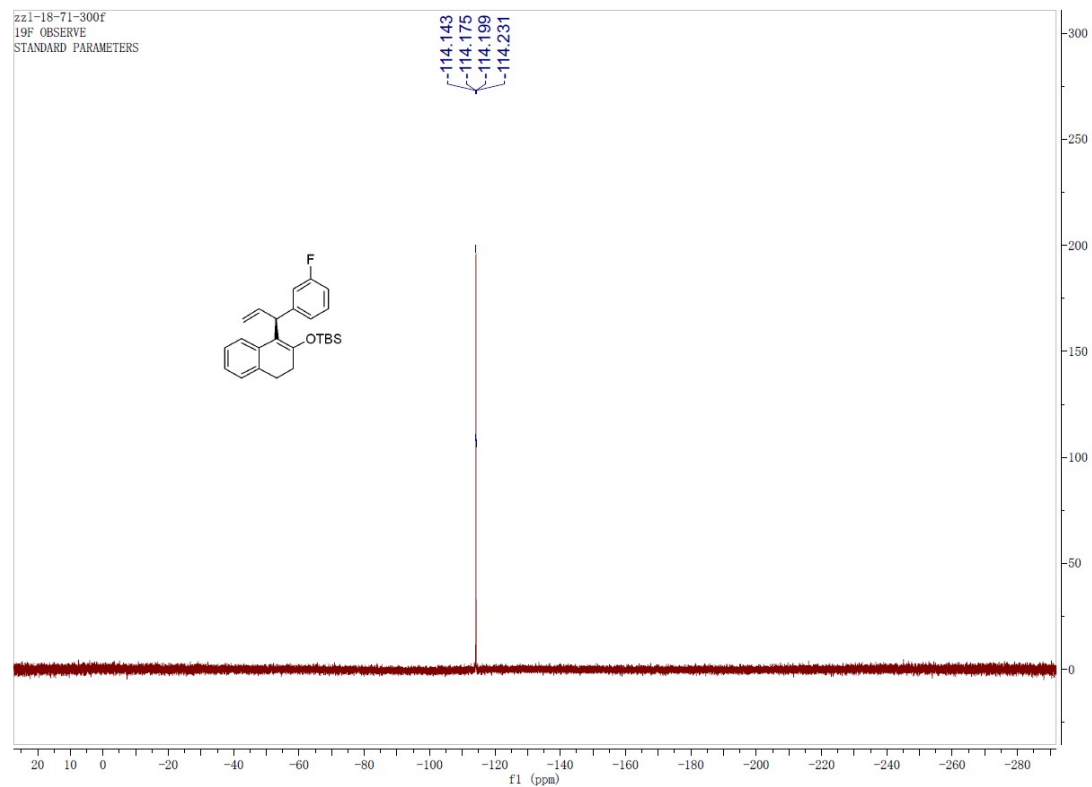

# HPLC Chromatograph of 3ag

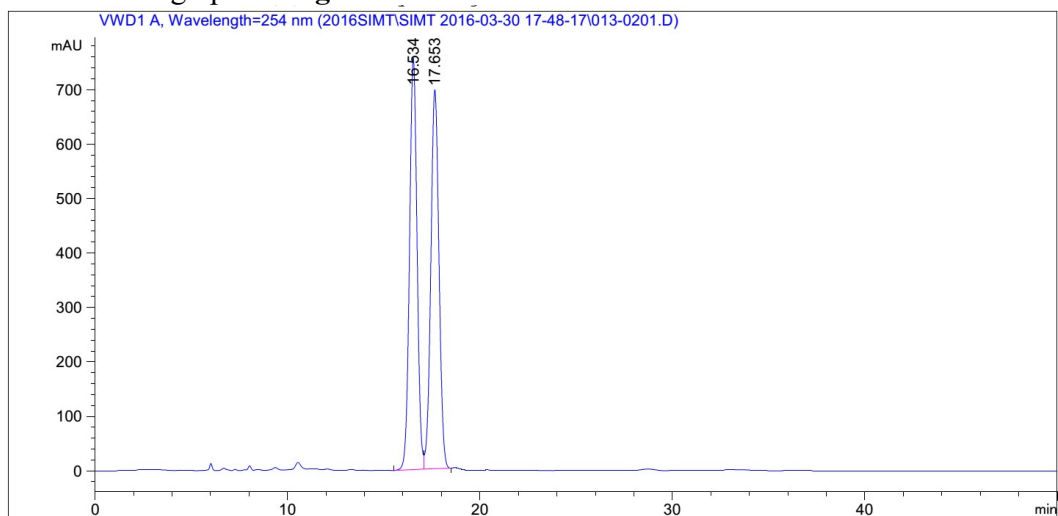

## Area Percent Report

Sorted By : Signal  
Multiplier: : 1.0000  
Dilution: : 1.0000  
Use Multiplier & Dilution Factor with ISTDs

Signal 1: VWD1 A, Wavelength=254 nm

| Peak # | RetTime [min] | Type | Width [min] | Area [mAU*s] | Height [mAU] | Area %  |
|--------|---------------|------|-------------|--------------|--------------|---------|
| 1      | 16.534        | BV   | 0.4260      | 2.06015e4    | 755.74609    | 50.1901 |
| 2      | 17.653        | VB   | 0.4588      | 2.04455e4    | 695.80554    | 49.8099 |

Totals : 4.10470e4 1451.55164

\*\*\* End of Report \*\*\*

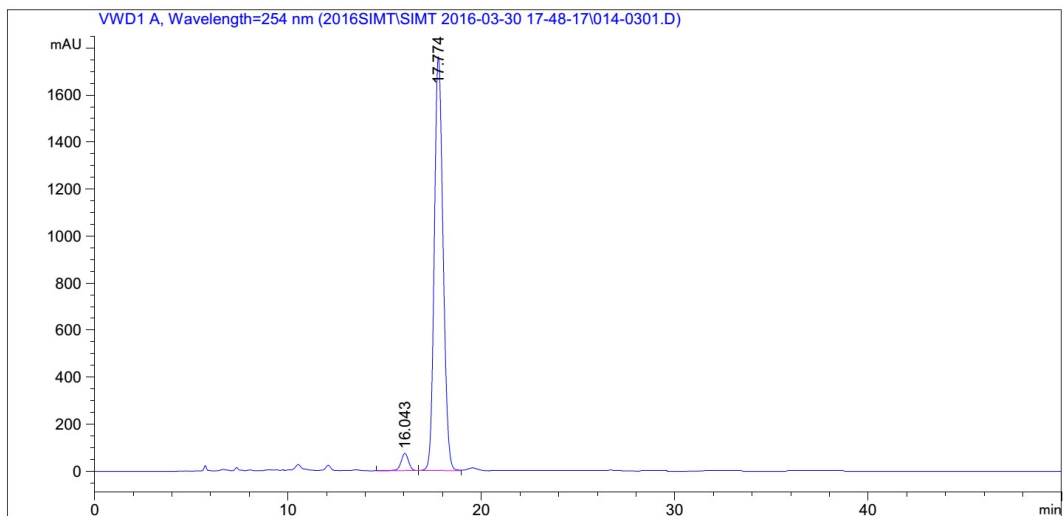

=====  
Area Percent Report  
=====

Sorted By : Signal  
Multiplier: : 1.0000  
Dilution: : 1.0000  
Use Multiplier & Dilution Factor with ISTDs

Signal 1: VWD1 A, Wavelength=254 nm

| Peak # | RetTime [min] | Type | Width [min] | Area [mAU*s] | Height [mAU] | Area %  |
|--------|---------------|------|-------------|--------------|--------------|---------|
| 1      | 16.043        | BB   | 0.4204      | 1997.81897   | 73.66225     | 3.4732  |
| 2      | 17.774        | BV   | 0.4879      | 5.55237e4    | 1760.82458   | 96.5268 |

Totals : 5.75216e4 1834.48684

=====  
\*\*\* End of Report \*\*\*

Chemical structure of compound 10 is shown. The  $^1\text{H}$  NMR spectrum (CDCl<sub>3</sub>) displays peaks corresponding to the structure, with chemical shifts (ppm) listed above the spectrum and integration values below the spectrum.

Chemical shifts (ppm): 7.316, 7.312, 7.309, 7.181, 7.175, 7.165, 7.146, 7.135, 7.118, 7.087, 7.077, 7.065, 7.065, 6.947, 6.942, 6.938, 6.935, 6.928, 6.925, 6.910, 6.810, 6.795, 6.787, 6.372, 6.352, 5.240, 5.222, 5.219, 5.216, 5.193, 2.928, 2.911, 2.900, 2.883, 2.874, 2.857, 2.840, 2.819, 2.568, 2.552, 2.540, 2.524, 2.466, 2.449, 2.431, 2.409, 0.876, -0.177, -0.153.

Integration values: 1.09, 4.22, 2.10, 0.99, 1.00, 3.11, 2.12, 2.11, 9.38, 6.03.

Chemical structure of compound 17 is shown in the upper left. The structure is a naphthalene derivative with an OTBS group at position 1, a vinyl group at position 2, and a 4-chlorophenyl group at position 3.

The  $^{13}\text{C}$  NMR spectrum (f1 (ppm)) shows the following chemical shifts (ppm) labeled above the peaks:

- 152.202, 145.514, 138.084, 135.291, 134.533, 134.065, 129.765, 127.868, 127.360, 126.265, 126.007, 124.892, 124.743, 118.019, 116.171
- 77.867, 77.444, 77.020 (solvent triplet)
- 45.445
- 29.884
- 26.216
- 18.544
- 2.865, 2.914

# HPLC Chromatograph of 3ah

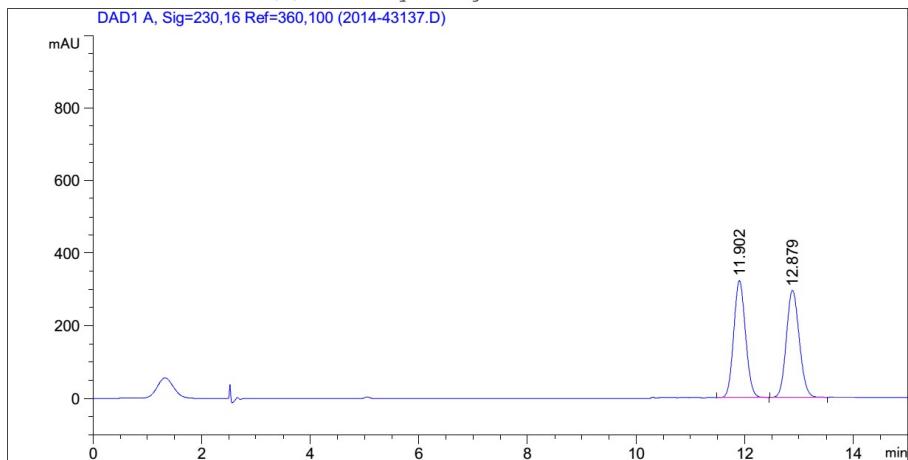

## Area Percent Report

Sorted By : Signal  
Multiplier : 1.0000  
Dilution : 1.0000  
Do not use Multiplier & Dilution Factor with ISTDs

Signal 1: DAD1 A, Sig=230,16 Ref=360,100

| Peak # | RetTime [min] | Type | Width [min] | Area [mAU*s] | Height [mAU] | Area %  |
|--------|---------------|------|-------------|--------------|--------------|---------|
| 1      | 11.902        | BB   | 0.2376      | 4874.36963   | 322.02182    | 49.9506 |
| 2      | 12.879        | BB   | 0.2591      | 4884.01904   | 295.01700    | 50.0494 |

Totals : 9758.38867 617.03882

\*\*\* End of Report \*\*\*

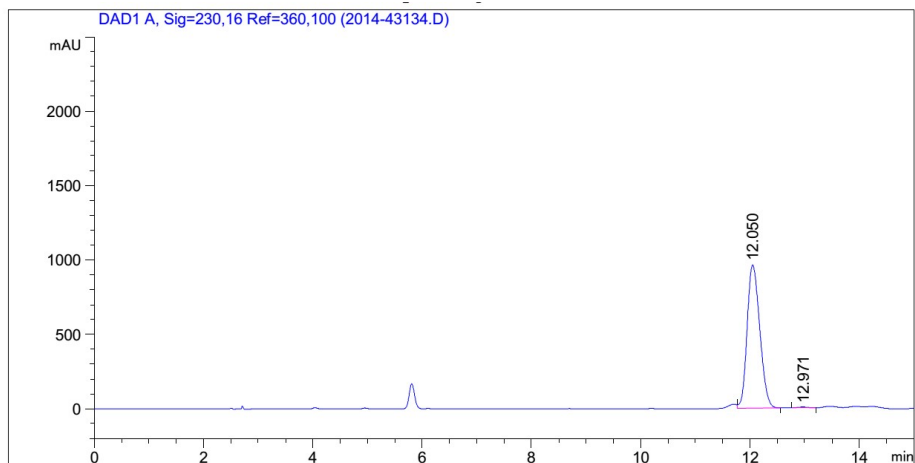

=====  
Area Percent Report  
=====

Sorted By : Signal  
Multiplier : 1.0000  
Dilution : 1.0000  
Do not use Multiplier & Dilution Factor with ISTDs

Signal 1: DAD1 A, Sig=230,16 Ref=360,100

| Peak # | RetTime [min] | Type | Width [min] | Area [mAU*s] | Height [mAU] | Area %  |
|--------|---------------|------|-------------|--------------|--------------|---------|
| 1      | 12.050        | VB   | 0.2510      | 1.55333e4    | 963.75989    | 99.4488 |
| 2      | 12.971        | MM R | 0.2171      | 86.09091     | 6.60911      | 0.5512  |

Totals : 1.56194e4 970.36899

=====  
\*\*\* End of Report \*\*\*



# <sup>1</sup>H NMR Spectra of **3ai**

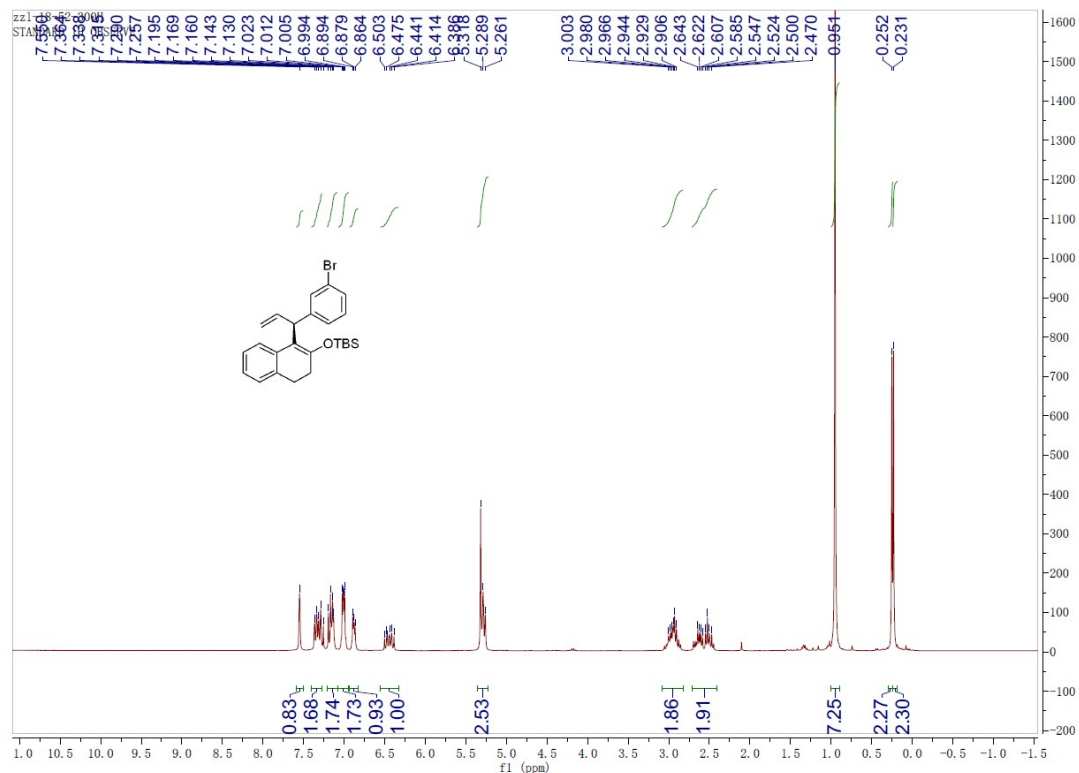

# <sup>13</sup>C NMR Spectra of **3ai**

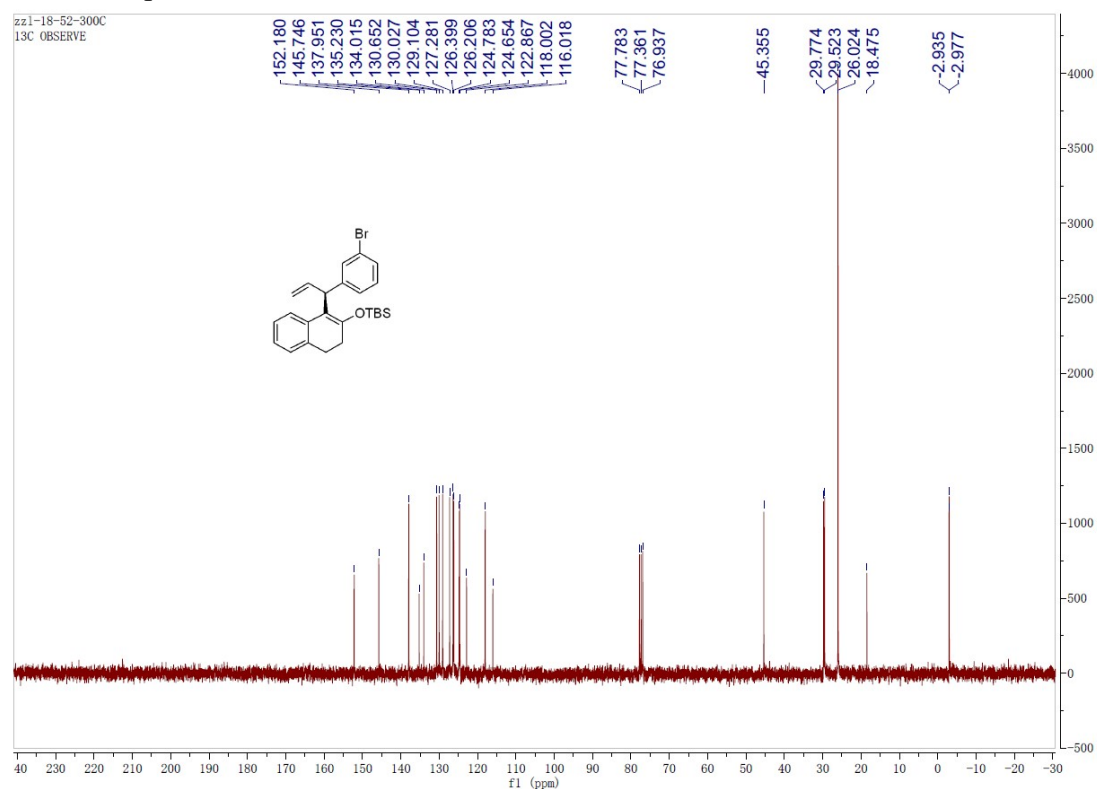

# HPLC Chromatograph of 3ai

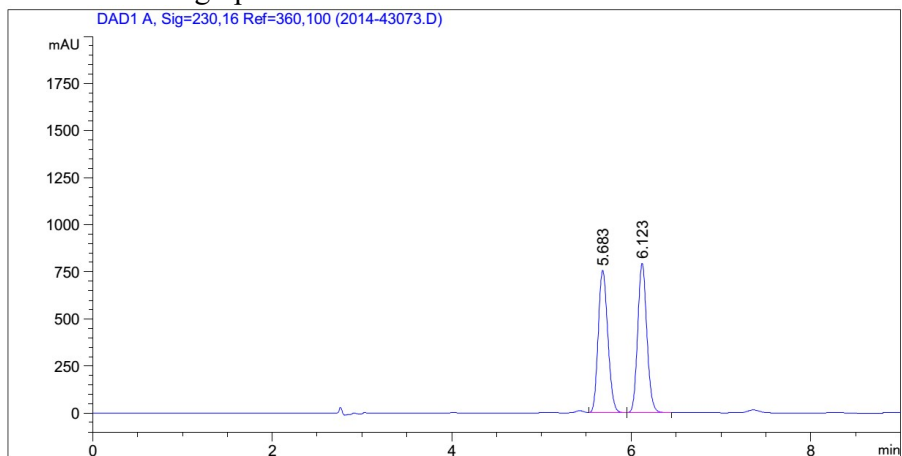

## Area Percent Report

Sorted By : Signal  
Multiplier : 1.0000  
Dilution : 1.0000  
Do not use Multiplier & Dilution Factor with ISTDs

Signal 1: DAD1 A, Sig=230,16 Ref=360,100

| Peak # | RetTime [min] | Type | Width [min] | Area [mAU*s] | Height [mAU] | Area %  |
|--------|---------------|------|-------------|--------------|--------------|---------|
| 1      | 5.683         | VB   | 0.1158      | 5622.43994   | 755.64978    | 49.9701 |
| 2      | 6.123         | BB   | 0.1097      | 5629.17090   | 793.93402    | 50.0299 |

Totals : 1.12516e4 1549.58380

\*\*\* End of Report \*\*\*

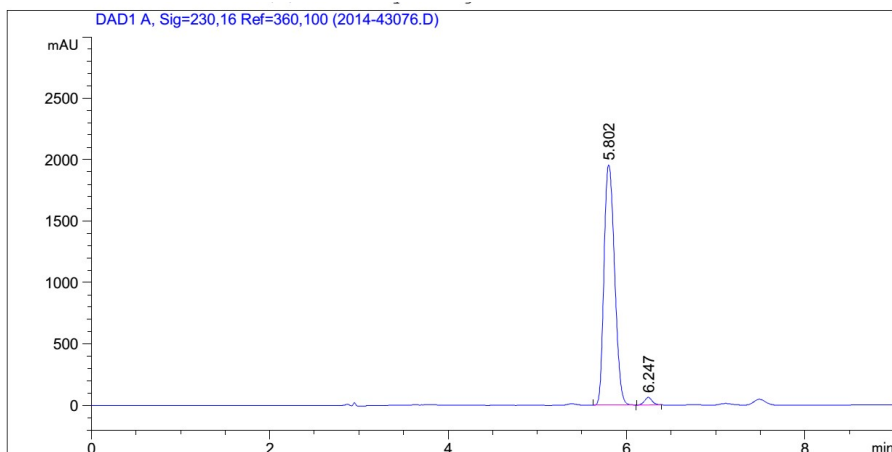

=====  
Area Percent Report  
=====

Sorted By : Signal  
Multiplier : 1.0000  
Dilution : 1.0000  
Do not use Multiplier & Dilution Factor with ISTDs

Signal 1: DAD1 A, Sig=230,16 Ref=360,100

| Peak # | RetTime [min] | Type | Width [min] | Area [mAU*s] | Height [mAU] | Area %  |
|--------|---------------|------|-------------|--------------|--------------|---------|
| 1      | 5.802         | BV   | 0.1314      | 1.61569e4    | 1956.34985   | 97.7690 |
| 2      | 6.247         | MM R | 0.0910      | 368.68527    | 61.78312     | 2.2310  |

Totals : 1.65256e4 2018.13298

=====  
\*\*\* End of Report \*\*\*

### <sup>1</sup>H NMR Spectra of **3aj**

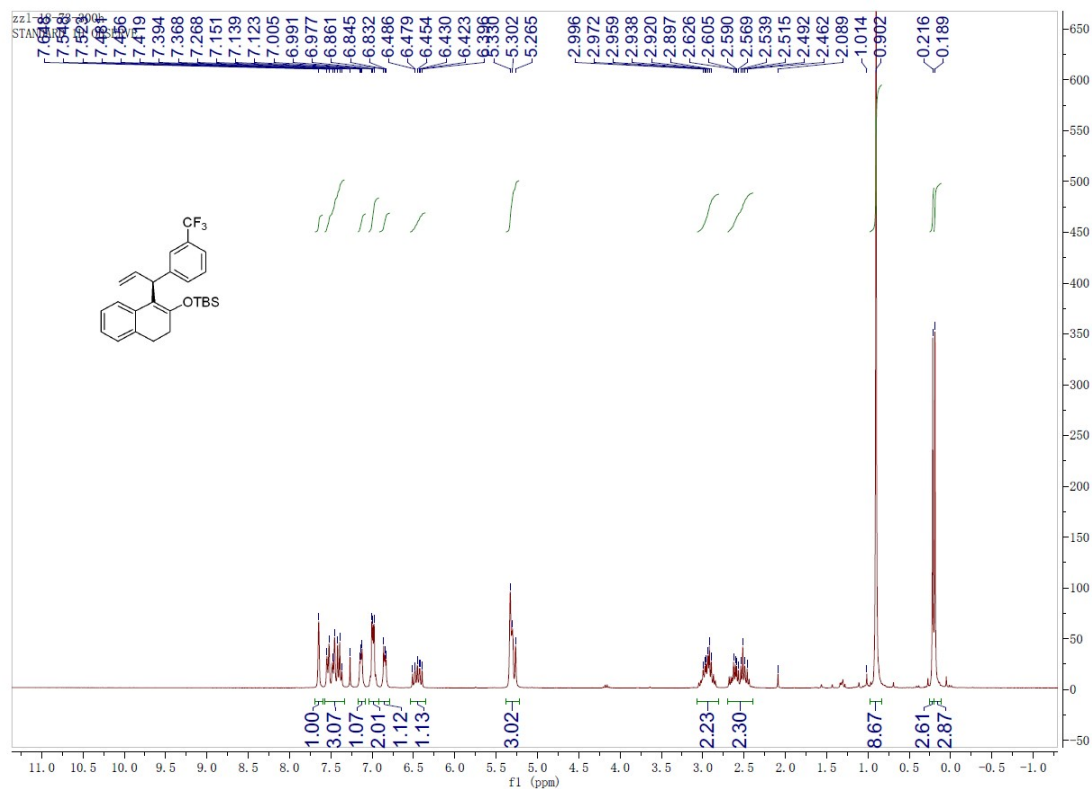

### <sup>13</sup>C NMR Spectra of **3aj**

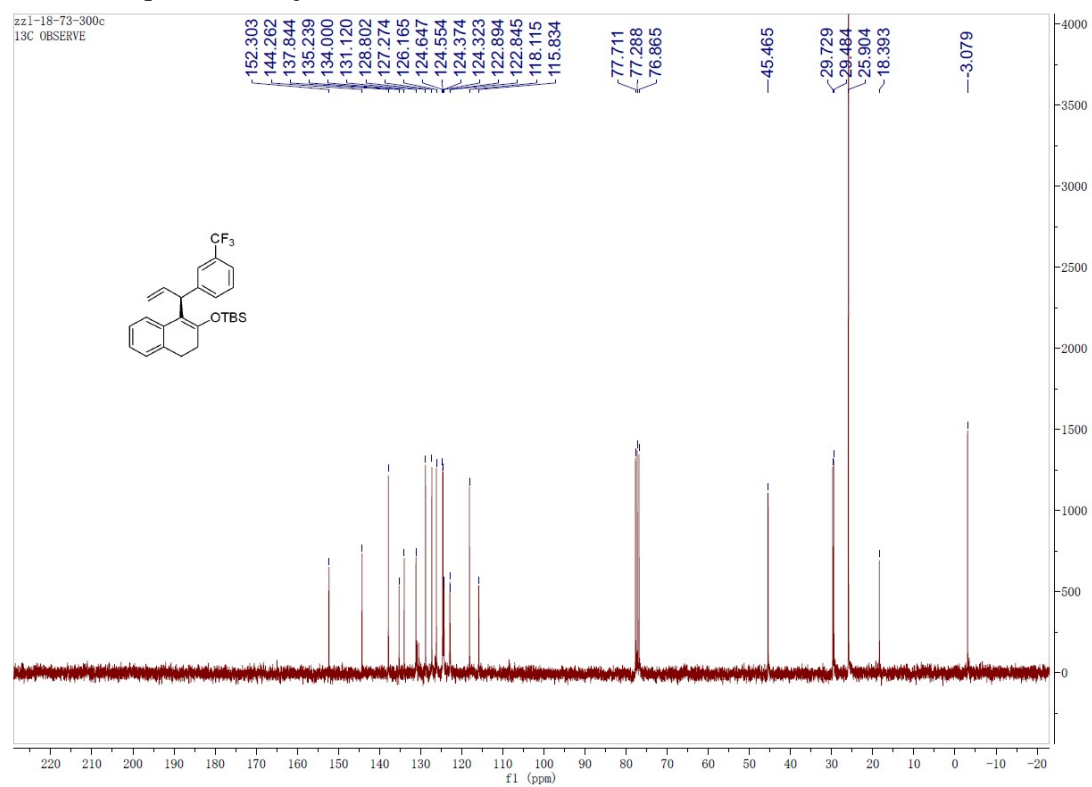

# <sup>19</sup>F NMR Spectra of **3aj**

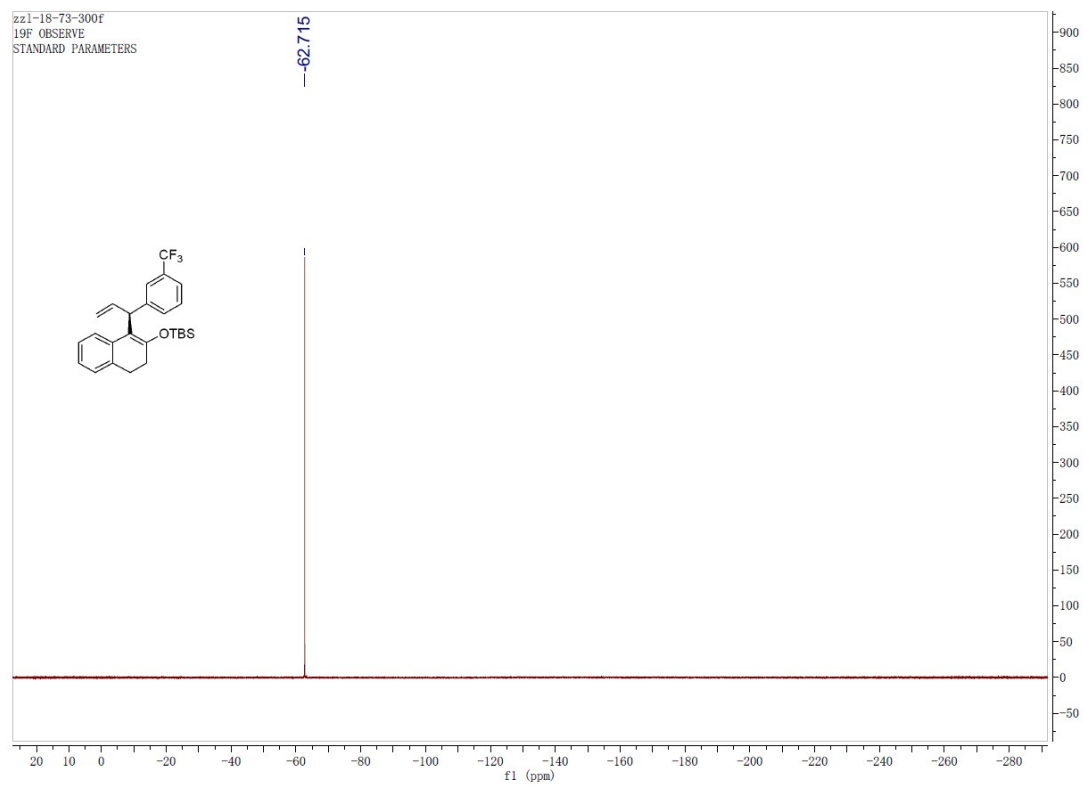

# HPLC Chromatograph of 3aj

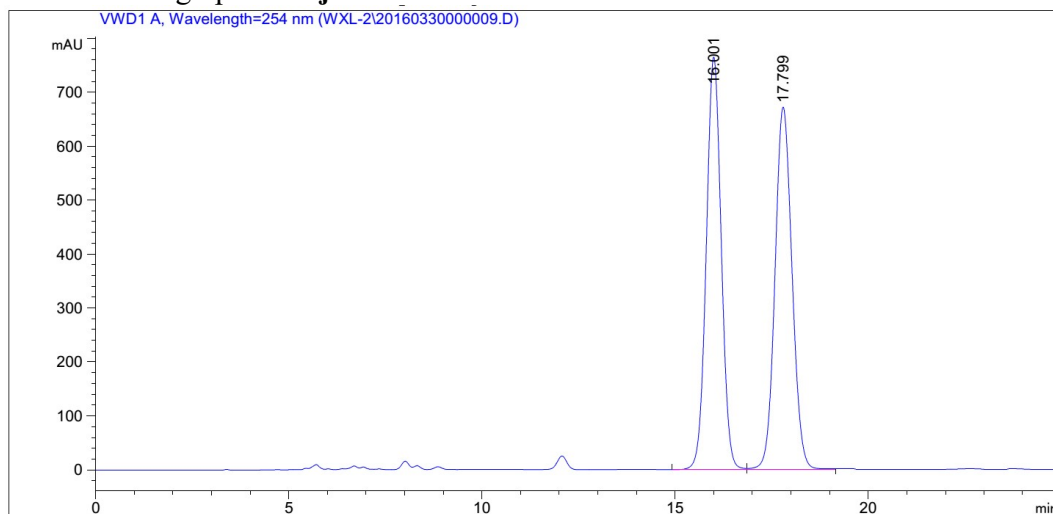

## Area Percent Report

Sorted By : Signal  
Multiplier: : 1.0000  
Dilution: : 1.0000  
Use Multiplier & Dilution Factor with ISTDs

Signal 1: VWD1 A, Wavelength=254 nm

| Peak # | RetTime [min] | Type | Width [min] | Area [mAU*s] | Height [mAU] | Area %  |
|--------|---------------|------|-------------|--------------|--------------|---------|
| 1      | 16.001        | BV   | 0.4178      | 2.05708e4    | 764.84332    | 49.8934 |
| 2      | 17.799        | VV   | 0.4766      | 2.06587e4    | 672.08362    | 50.1066 |

Totals : 4.12295e4 1436.92694

\*\*\* End of Report \*\*\*

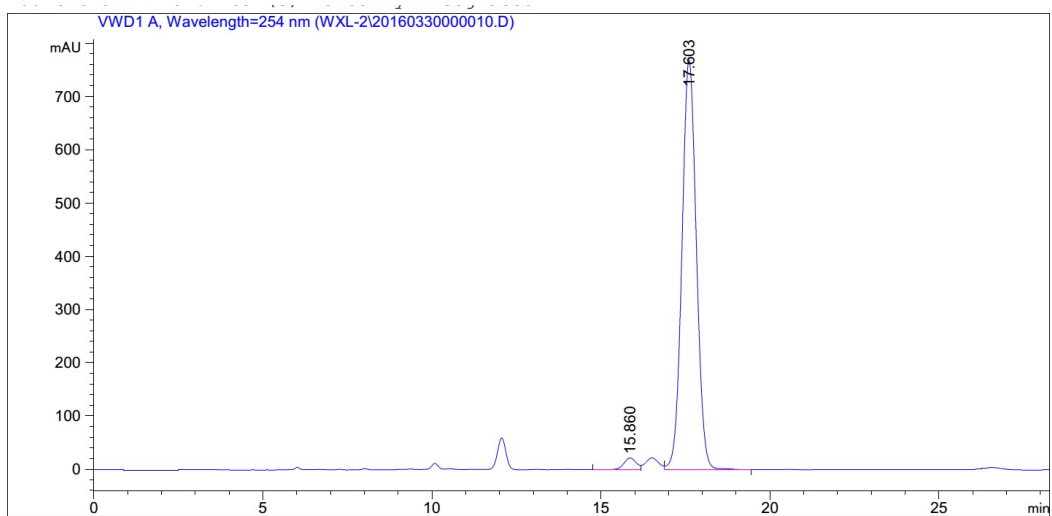

=====  
Area Percent Report  
=====

Sorted By : Signal  
Multiplier: : 1.0000  
Dilution: : 1.0000  
Use Multiplier & Dilution Factor with ISTDs

Signal 1: VWD1 A, Wavelength=254 nm

| Peak # | RetTime [min] | Type | Width [min] | Area [mAU*s] | Height [mAU] | Area %  |
|--------|---------------|------|-------------|--------------|--------------|---------|
| 1      | 15.860        | BV   | 0.3935      | 570.91980    | 22.08888     | 2.4418  |
| 2      | 17.603        | VB   | 0.4617      | 2.28098e4    | 769.77924    | 97.5582 |

Totals : 2.33807e4 791.86812

=====  
\*\*\* End of Report \*\*\*

# <sup>1</sup>H NMR Spectra of **3ak**

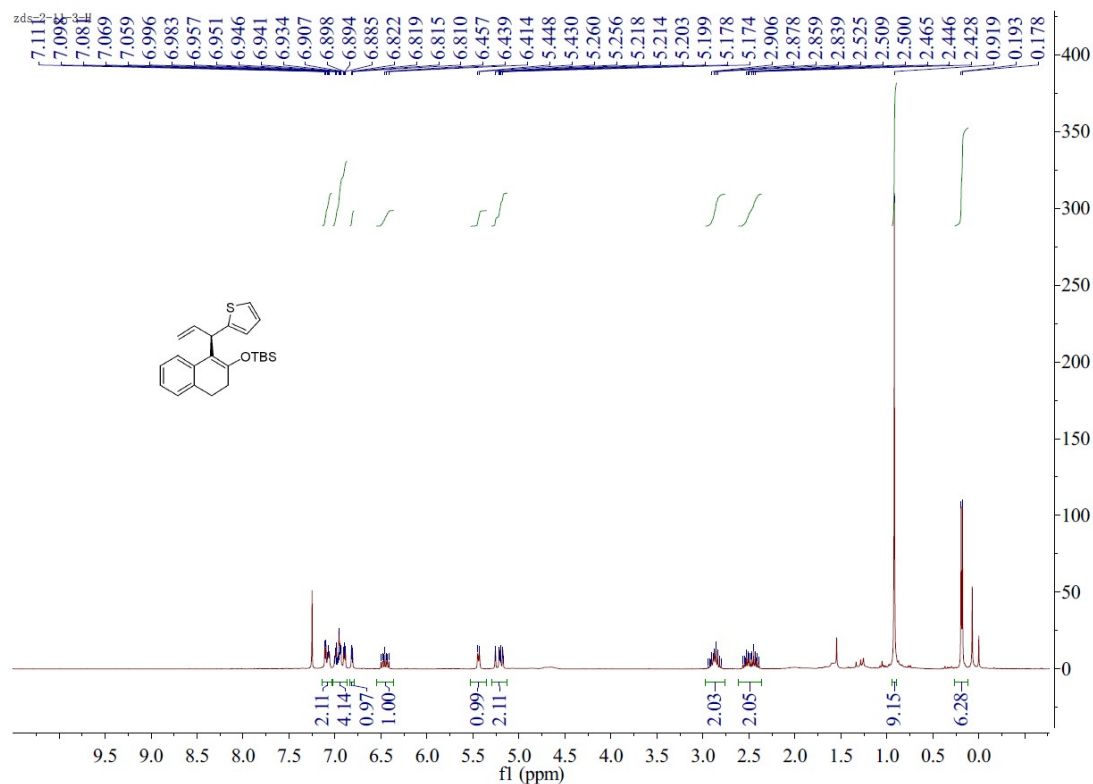

# <sup>13</sup>C NMR Spectra of **3ak**

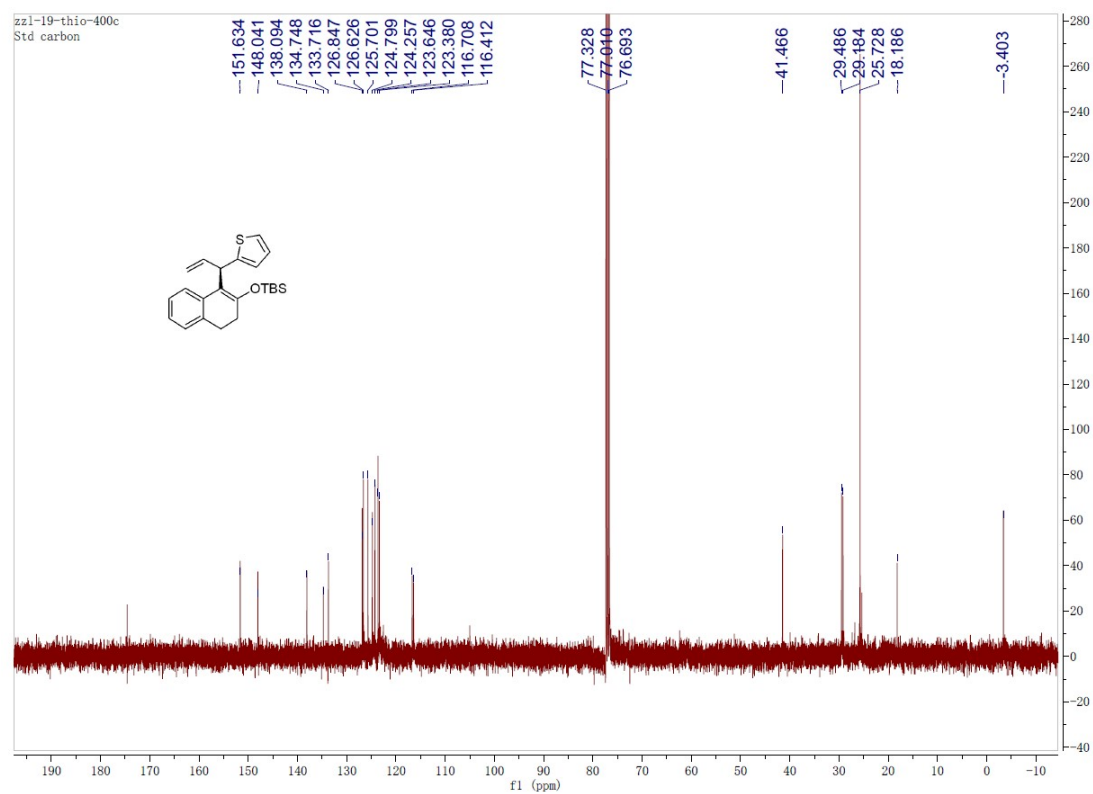



# HPLC Chromatograph of 3ak

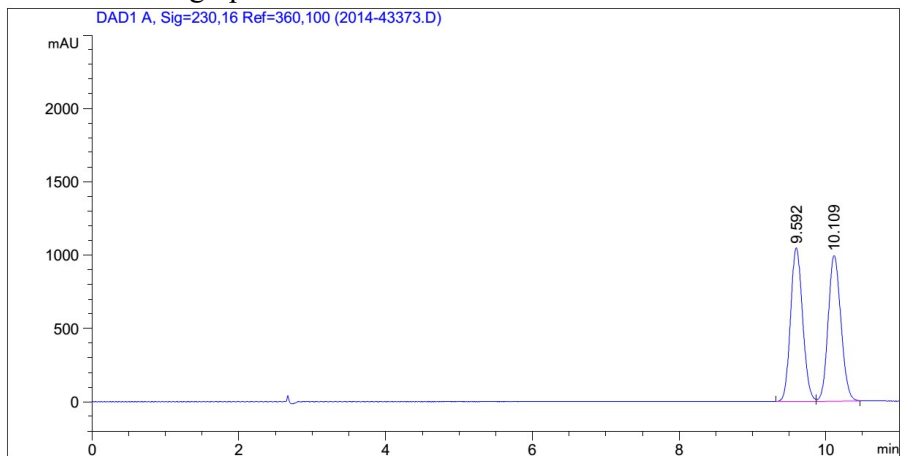

## Area Percent Report

Sorted By : Signal  
Multiplier : 1.0000  
Dilution : 1.0000  
Do not use Multiplier & Dilution Factor with ISTDs

Signal 1: DAD1 A, Sig=230,16 Ref=360,100

| Peak # | RetTime [min] | Type | Width [min] | Area [mAU*s] | Height [mAU] | Area %  |
|--------|---------------|------|-------------|--------------|--------------|---------|
| 1      | 9.592         | BV   | 0.1783      | 1.19552e4    | 1046.10632   | 49.9215 |
| 2      | 10.109        | VV   | 0.1872      | 1.19928e4    | 990.58411    | 50.0785 |

Totals : 2.39481e4 2036.69043

\*\*\* End of Report \*\*\*

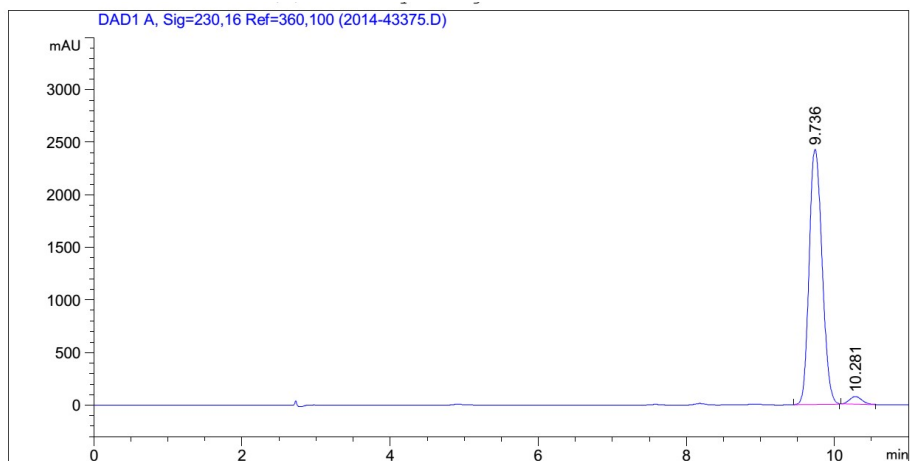

=====  
Area Percent Report  
=====

Sorted By : Signal  
Multiplier : 1.0000  
Dilution : 1.0000  
Do not use Multiplier & Dilution Factor with ISTDs

Signal 1: DAD1 A, Sig=230,16 Ref=360,100

| Peak # | RetTime [min] | Type | Width [min] | Area [mAU*s] | Height [mAU] | Area %  |
|--------|---------------|------|-------------|--------------|--------------|---------|
| 1      | 9.736         | MM R | 0.2013      | 2.95429e4    | 2429.39087   | 97.2732 |
| 2      | 10.281        | MM R | 0.1763      | 828.16418    | 72.45634     | 2.7268  |

Totals : 3.03711e4 2501.84721

=====  
\*\*\* End of Report \*\*\*

### <sup>1</sup>H NMR Spectra of **3al**

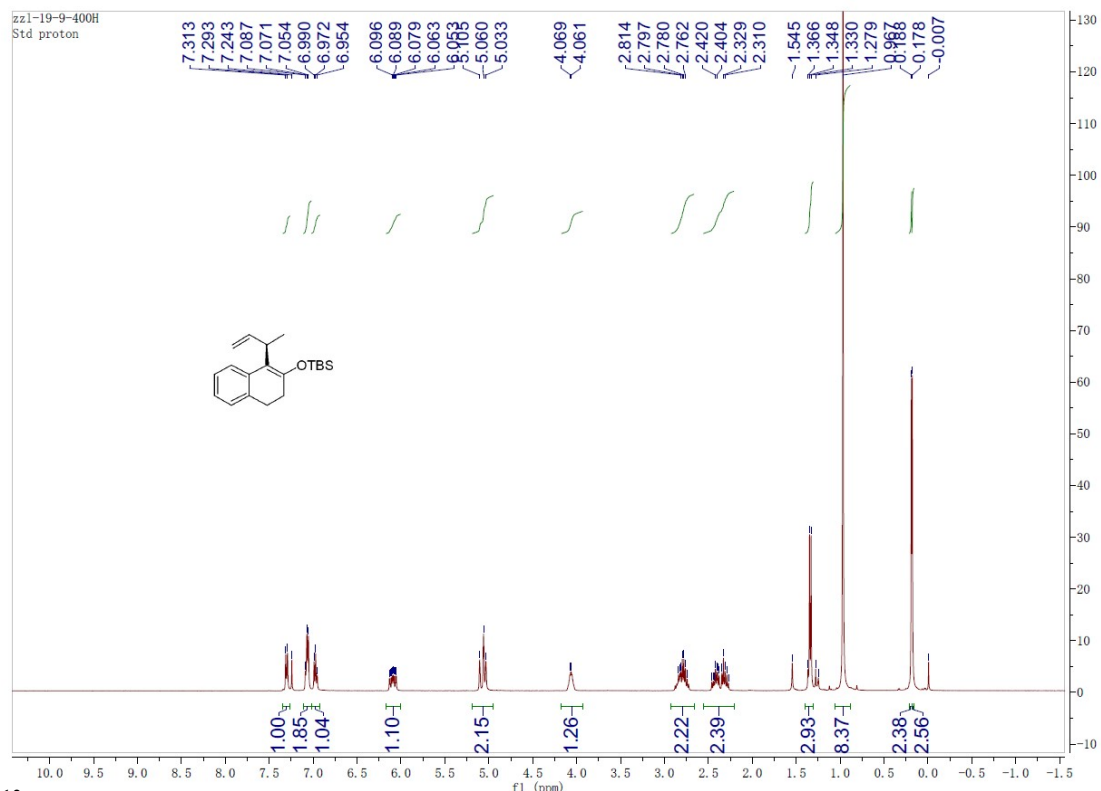<sup>13</sup>C NMR Spectra of **3al**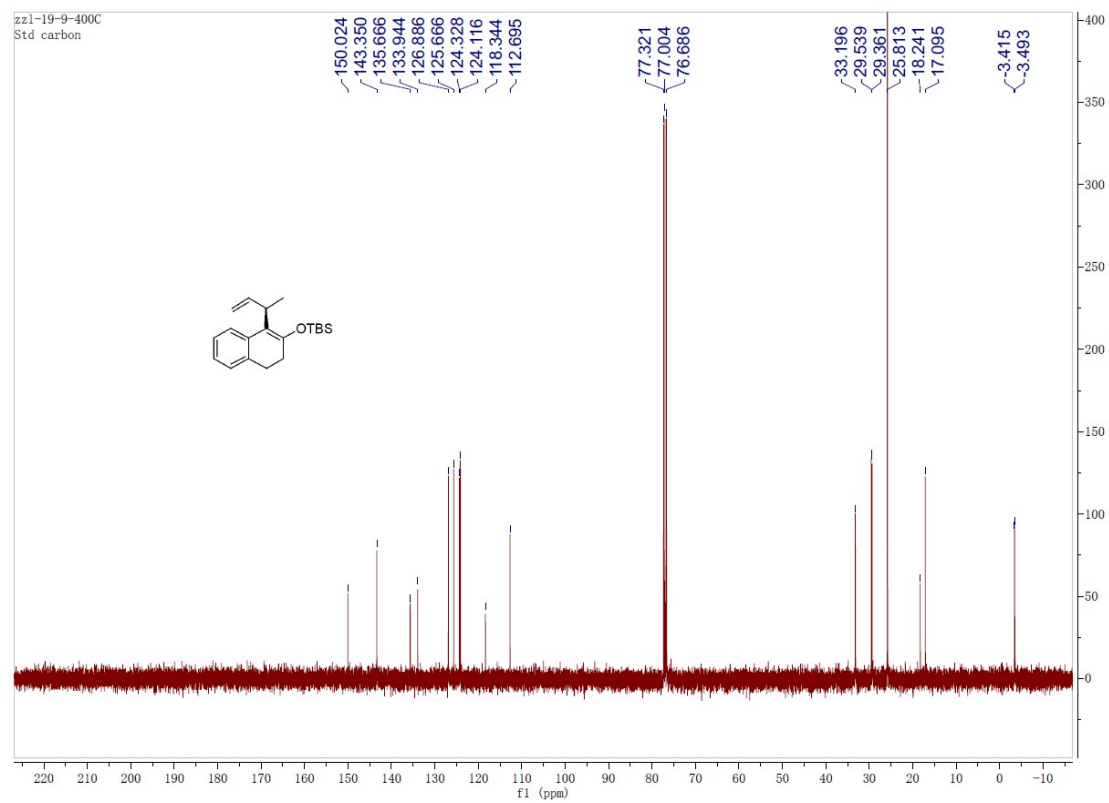

## HPLC Chromatograph of **3a**

< Chromatogram >

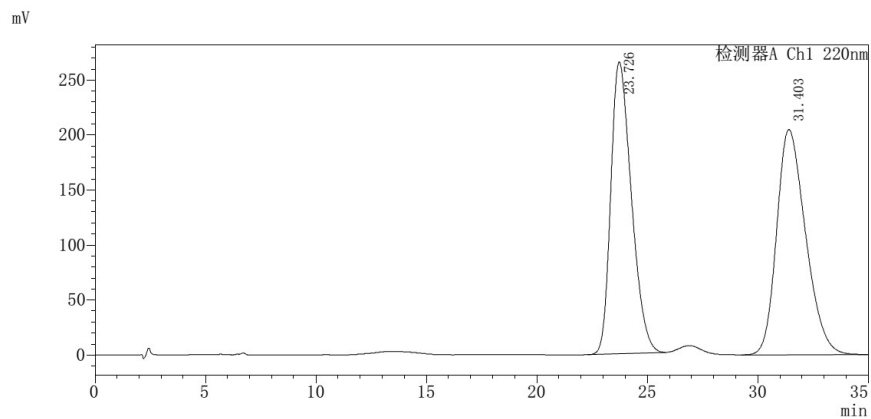

<Column Performance Report>

| Peak No. | Time   | Area     | Area % | Plate number | Tailing | Resolution |
|----------|--------|----------|--------|--------------|---------|------------|
| 1        | 23.726 | 17227258 | 48.074 | 1.333        | 340.81  | 265422     |
| 2        | 31.403 | 18607559 | 51.926 | 1.268        | 340.81  | 204790     |

< Chromatogram >

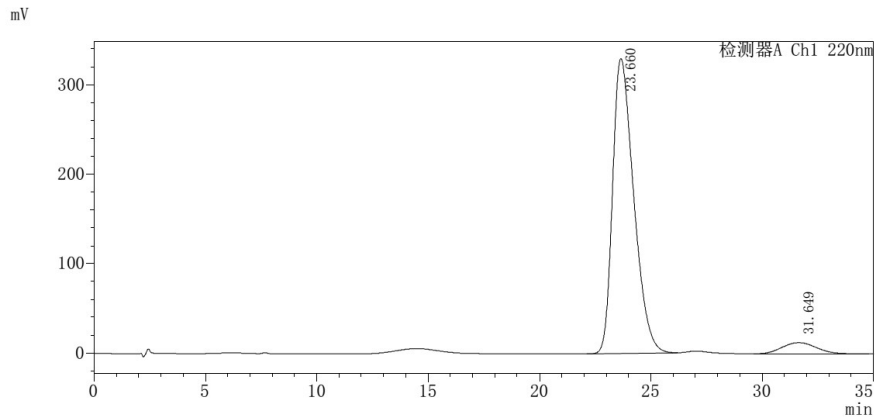

<Column Performance Report>

| Peak No. | Time   | Area     | Area % | Plate number | Tailing | Resolution |
|----------|--------|----------|--------|--------------|---------|------------|
| 1        | 23.660 | 21779776 | 94.130 | 1.409        | 268.10  | 329821     |
| 2        | 31.649 | 1358213  | 5.870  | 1.111        | 268.10  | 12501      |

# <sup>1</sup>H NMR Spectra of **3ba**

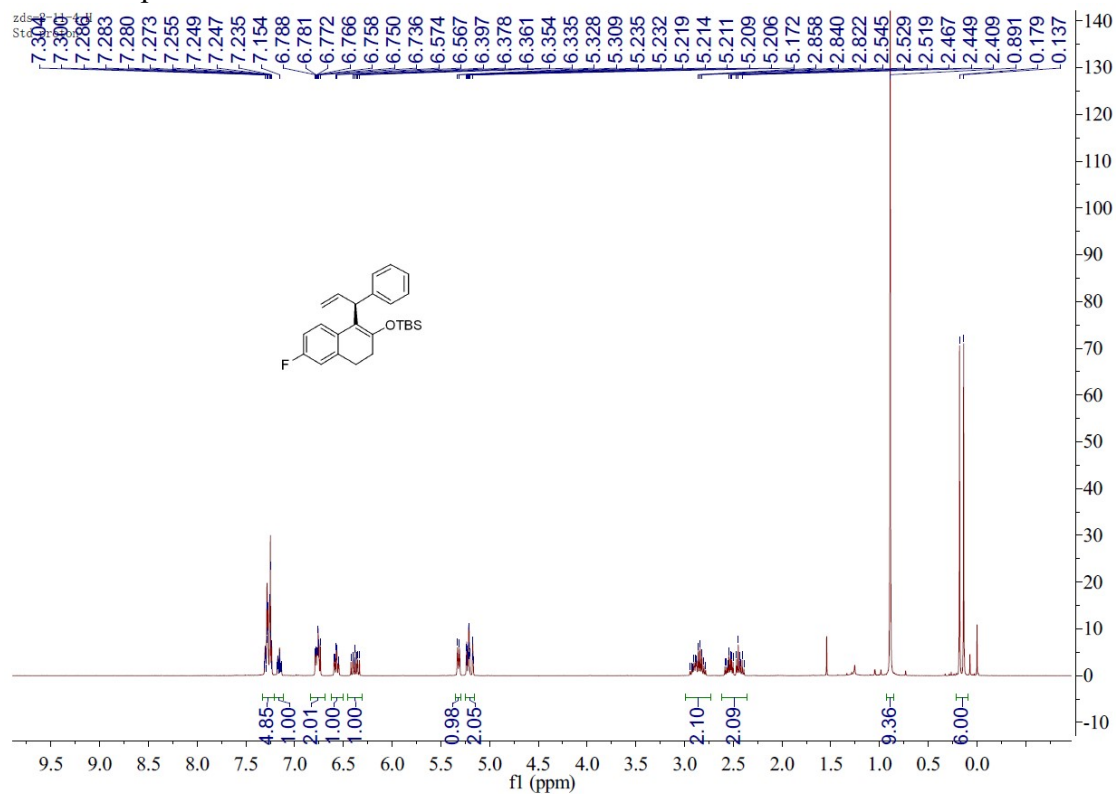

# <sup>13</sup>C NMR Spectra of **3ba**

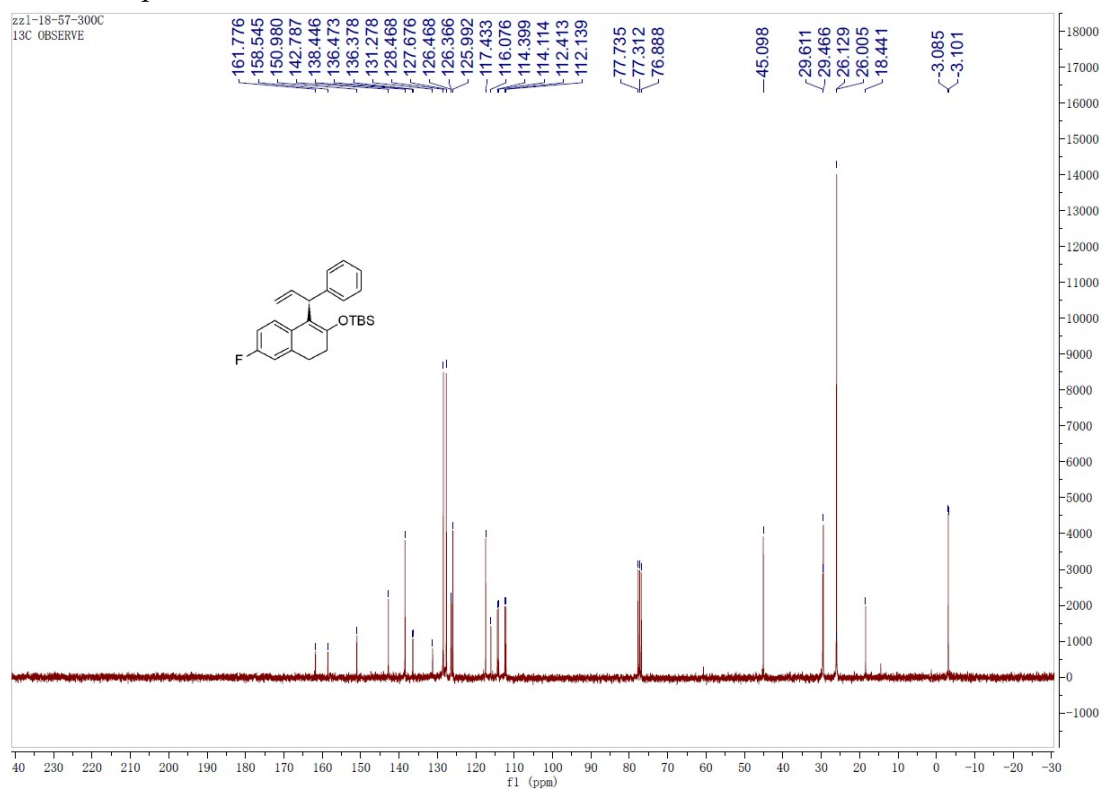

# <sup>19</sup>F NMR Spectra of **3ba**

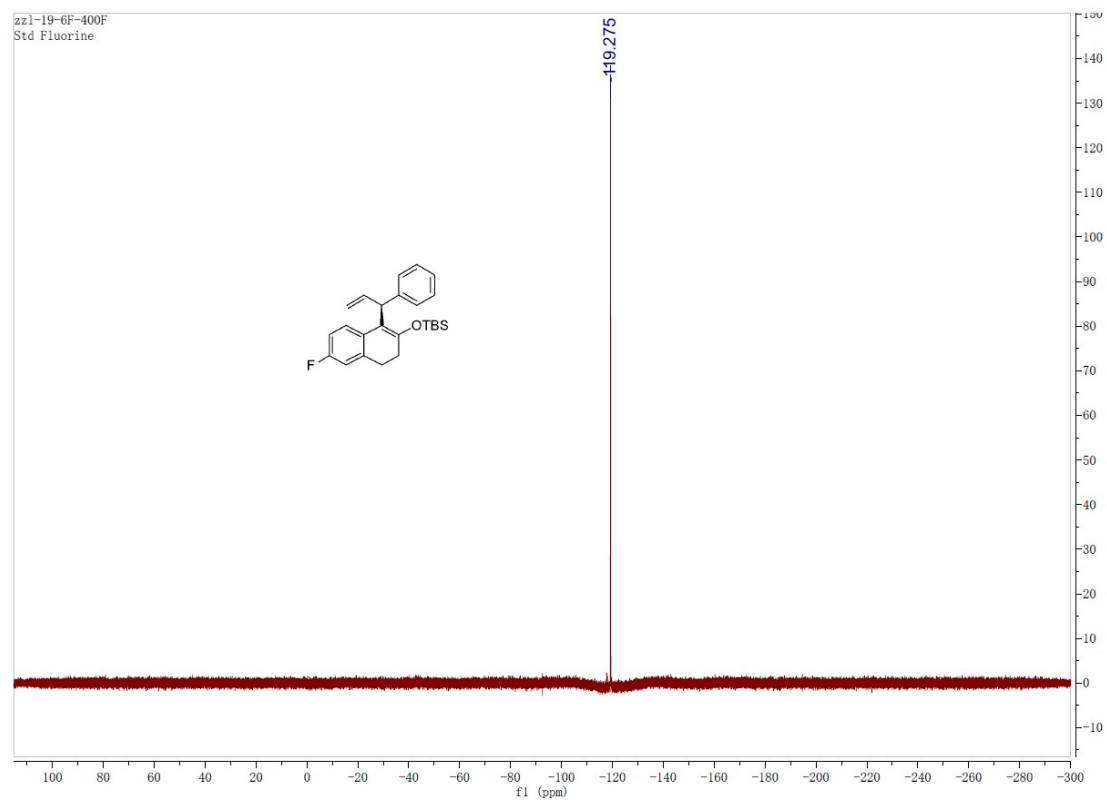

# HPLC Chromatograph of 3ba

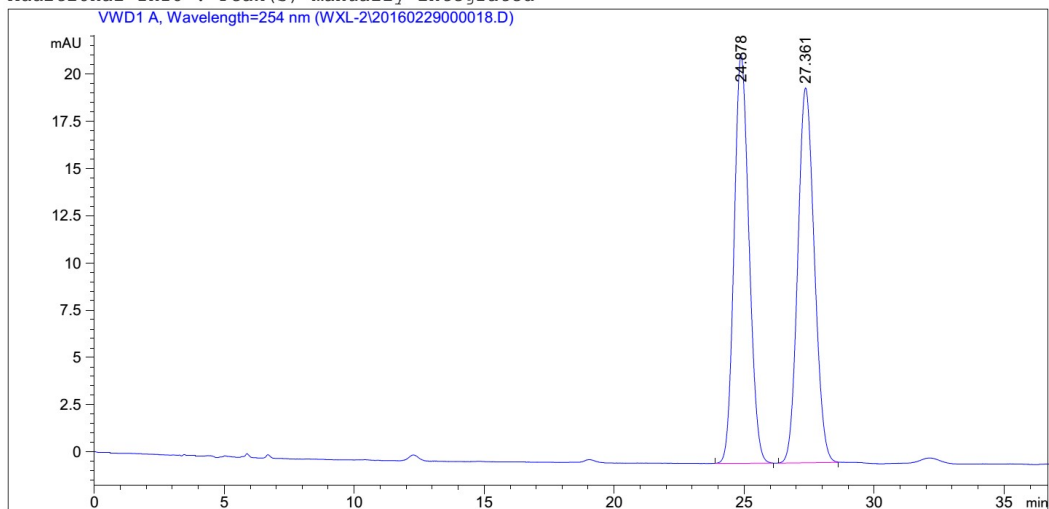

## Area Percent Report

Sorted By : Signal  
Multiplier: : 1.0000  
Dilution: : 1.0000  
Use Multiplier & Dilution Factor with ISTDs

Signal 1: VWD1 A, Wavelength=254 nm

| Peak # | RetTime [min] | Type | Width [min] | Area [mAU*s] | Height [mAU] | Area %  |
|--------|---------------|------|-------------|--------------|--------------|---------|
| 1      | 24.878        | VV   | 0.6062      | 859.69354    | 21.58390     | 49.4910 |
| 2      | 27.361        | VV   | 0.6636      | 877.37518    | 19.83303     | 50.5090 |

Totals : 1737.06873 41.41693

\*\*\* End of Report \*\*\*

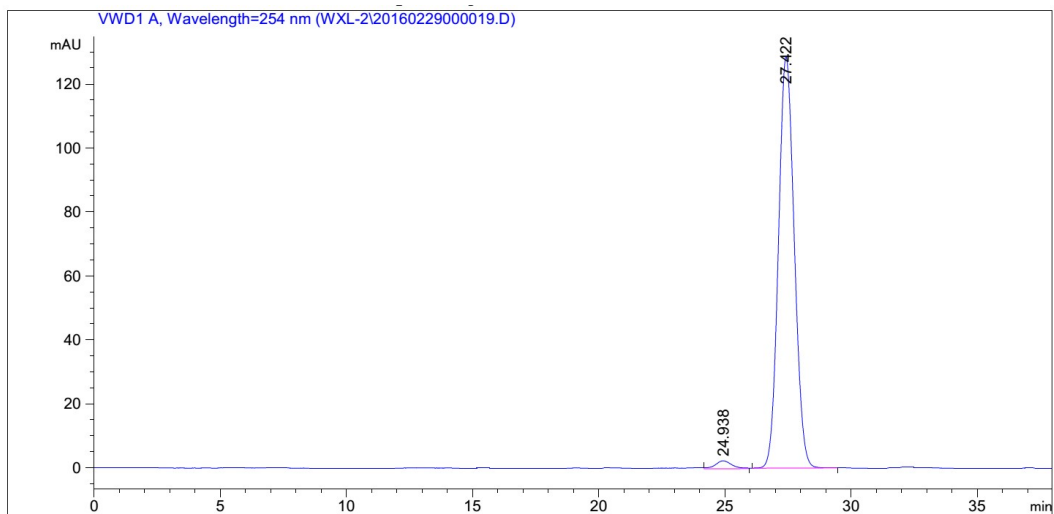

=====  
Area Percent Report  
=====

Sorted By : Signal  
Multiplier: : 1.0000  
Dilution: : 1.0000  
Use Multiplier & Dilution Factor with ISTDs

Signal 1: VWD1 A, Wavelength=254 nm

| Peak # | RetTime [min] | Type | Width [min] | Area [mAU*s] | Height [mAU] | Area %  |
|--------|---------------|------|-------------|--------------|--------------|---------|
| 1      | 24.938        | MM   | 0.7584      | 112.52441    | 2.47294      | 1.9673  |
| 2      | 27.422        | MM   | 0.7270      | 5607.18848   | 128.54735    | 98.0327 |

Totals : 5719.71288 131.02029

=====  
\*\*\* End of Report \*\*\*



# <sup>1</sup>H NMR Spectra of **3ca**

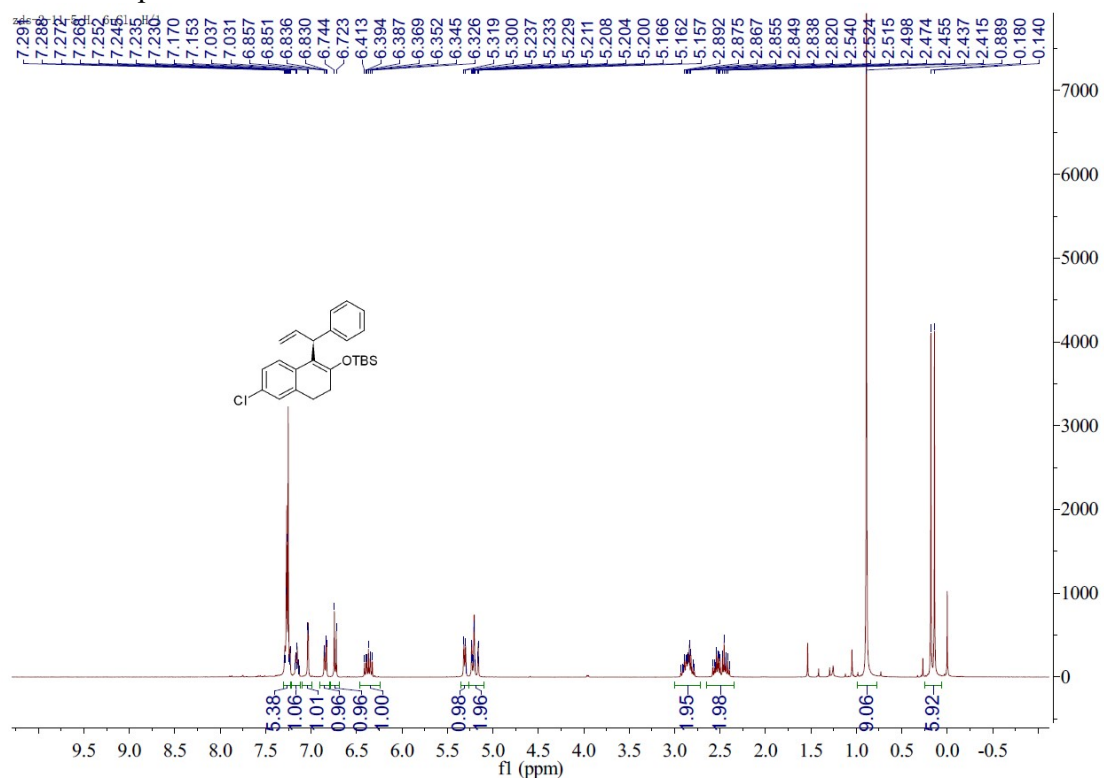

# <sup>13</sup>C NMR Spectra of **3ca**

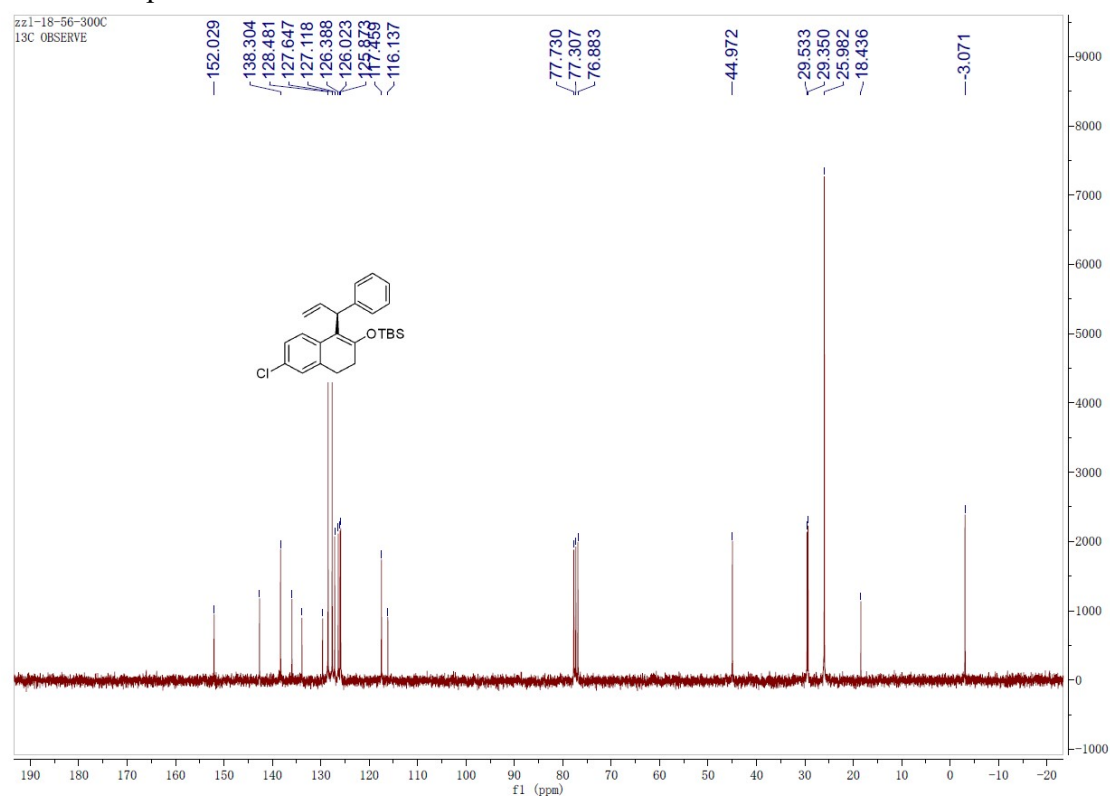

# HPLC Chromatograph of 3ca

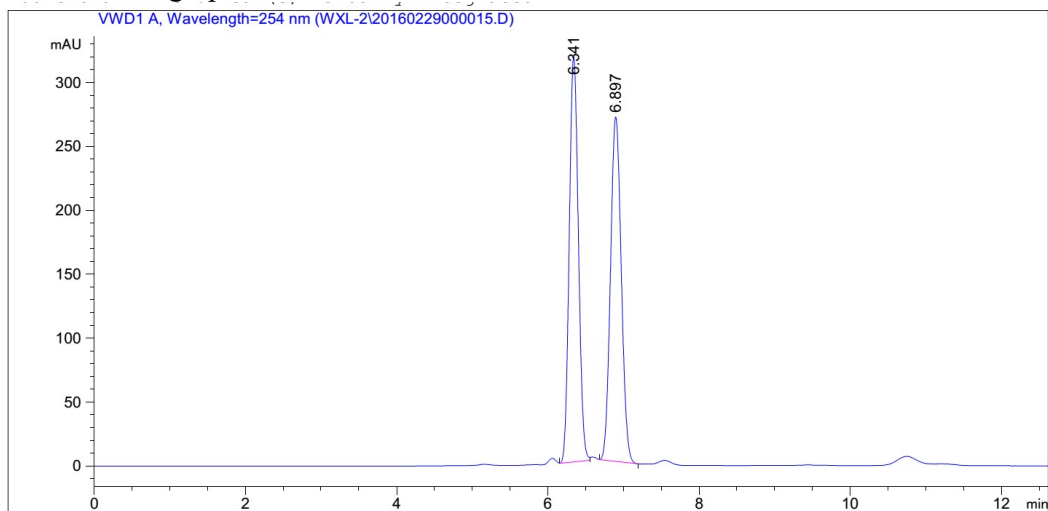

## Area Percent Report

Sorted By : Signal  
Multiplier: : 1.0000  
Dilution: : 1.0000  
Use Multiplier & Dilution Factor with ISTDs

Signal 1: VWD1 A, Wavelength=254 nm

| Peak # | RetTime [min] | Type | Width [min] | Area [mAU*s] | Height [mAU] | Area %  |
|--------|---------------|------|-------------|--------------|--------------|---------|
| 1      | 6.341         | BV   | 0.1322      | 2656.67944   | 317.21860    | 49.9812 |
| 2      | 6.897         | BB   | 0.1550      | 2658.67334   | 269.61063    | 50.0188 |

Totals : 5315.35278 586.82922

\*\*\* End of Report \*\*\*

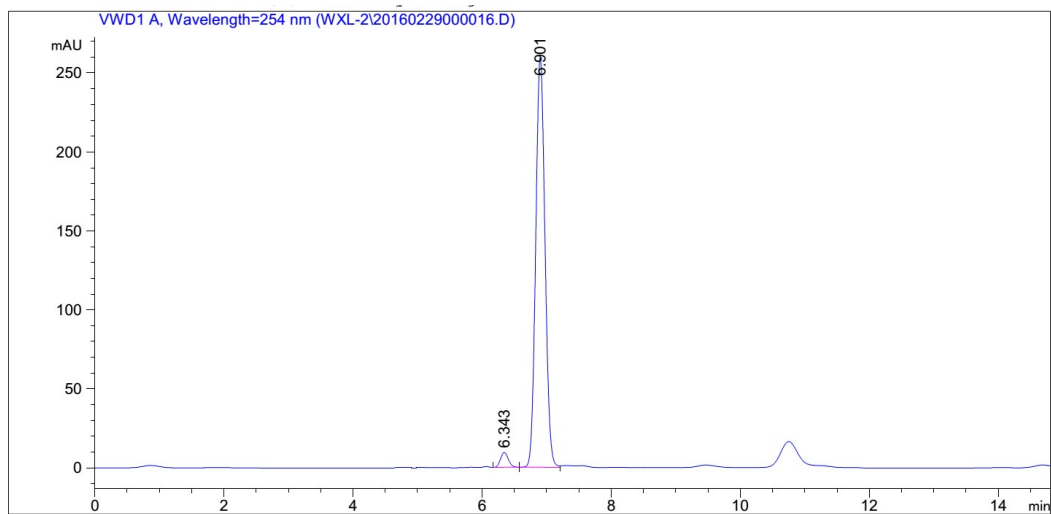

=====  
 Area Percent Report  
 =====

Sorted By : Signal  
 Multiplier: : 1.0000  
 Dilution: : 1.0000  
 Use Multiplier & Dilution Factor with ISTDs

Signal 1: VWD1 A, Wavelength=254 nm

| Peak # | RetTime [min] | Type | Width [min] | Area [mAU*s] | Height [mAU] | Area %  |
|--------|---------------|------|-------------|--------------|--------------|---------|
| 1      | 6.343         | BB   | 0.1317      | 78.79822     | 9.41176      | 2.9536  |
| 2      | 6.901         | BV   | 0.1564      | 2589.11401   | 259.51157    | 97.0464 |

Totals : 2667.91223 268.92332

=====  
 \*\*\* End of Report \*\*\*

# <sup>1</sup>H NMR Spectra of **3da**

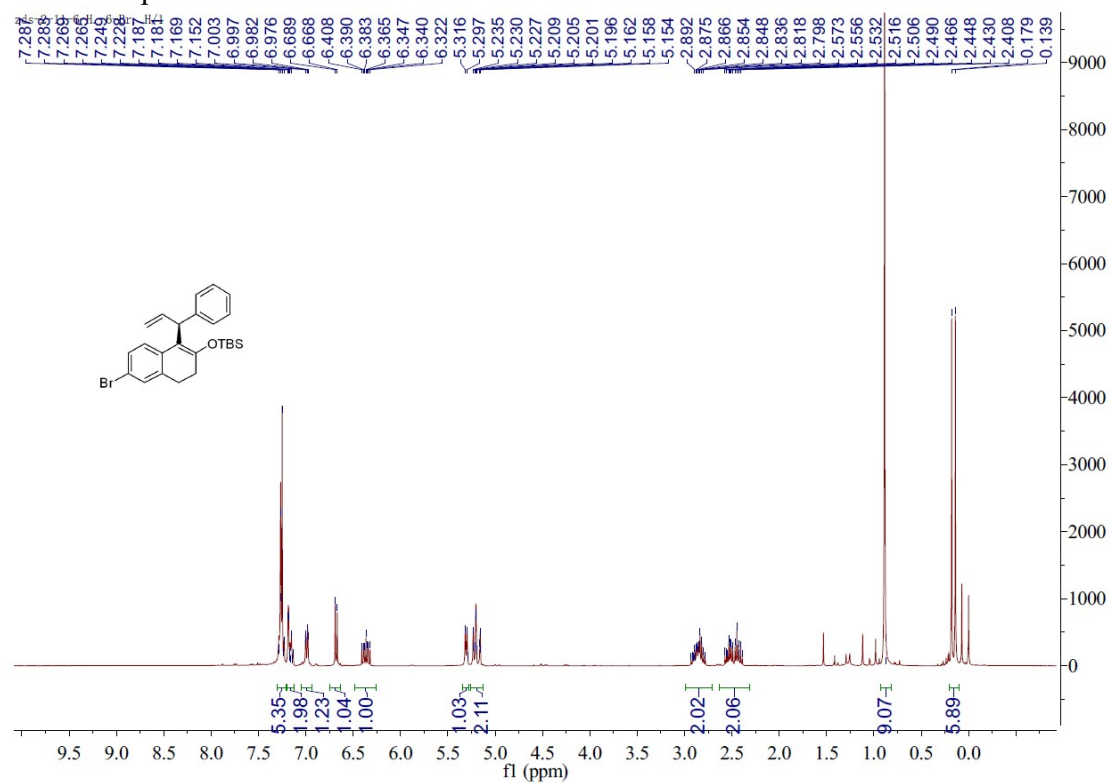

# <sup>13</sup>C NMR Spectra of **3da**

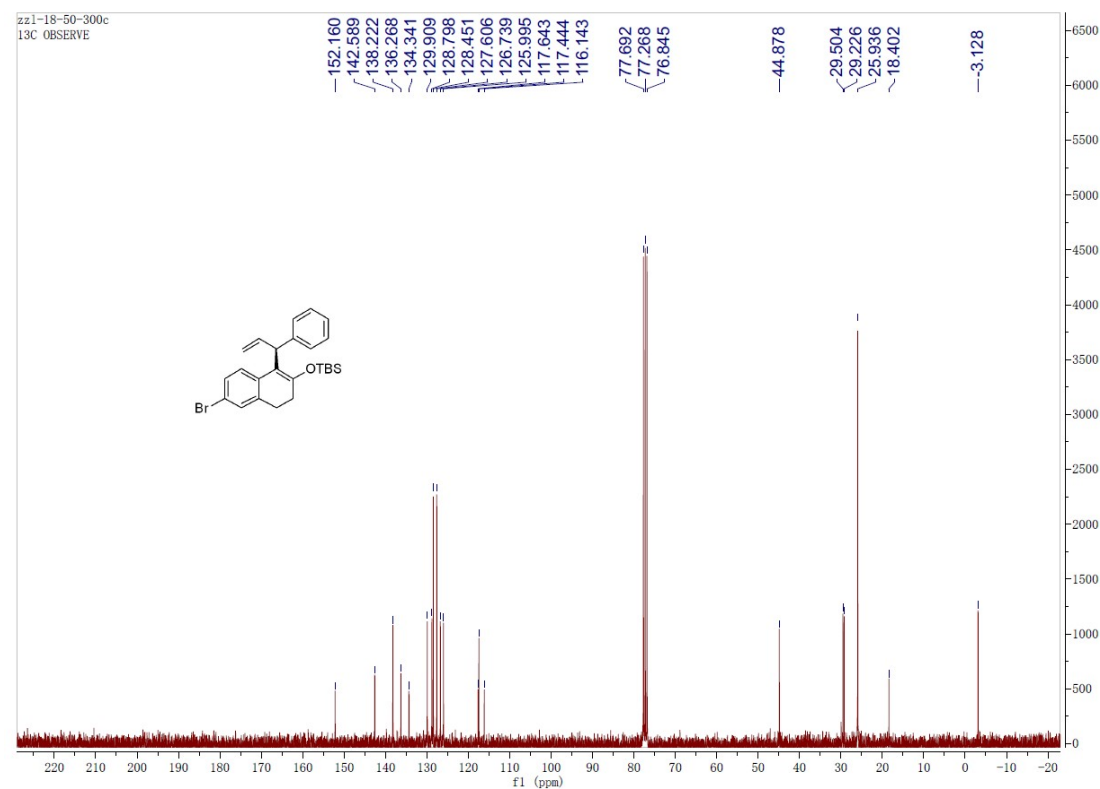

# HPLC Chromatograph of 3da

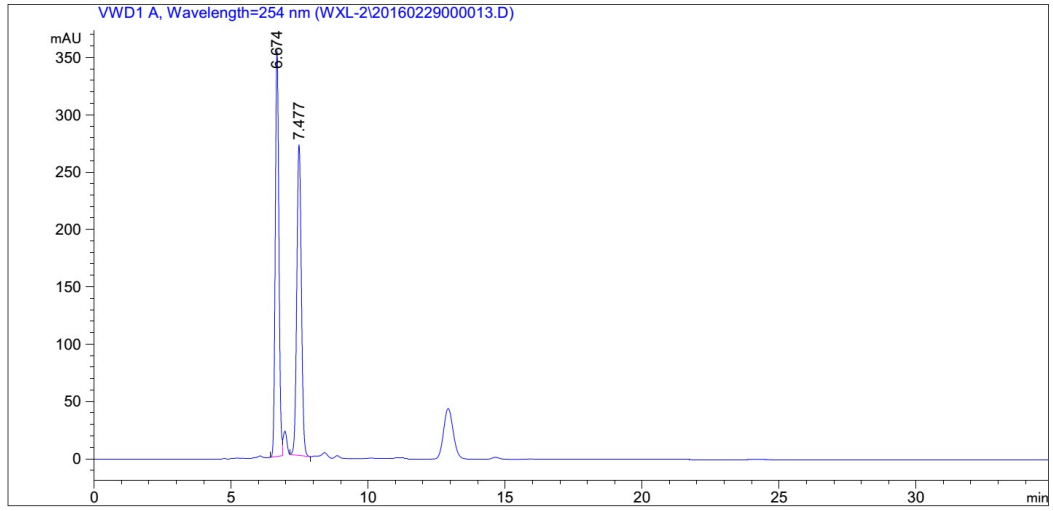

## Area Percent Report

Sorted By : Signal  
Multiplier: : 1.0000  
Dilution: : 1.0000  
Use Multiplier & Dilution Factor with ISTDs

Signal 1: VWD1 A, Wavelength=254 nm

| Peak # | RetTime [min] | Type | Width [min] | Area [mAU*s] | Height [mAU] | Area %  |
|--------|---------------|------|-------------|--------------|--------------|---------|
| 1      | 6.674         | BV   | 0.1440      | 3262.19849   | 354.00357    | 50.9179 |
| 2      | 7.477         | BB   | 0.1809      | 3144.58740   | 271.00266    | 49.0821 |

Totals : 6406.78589 625.00623

\*\*\* End of Report \*\*\*

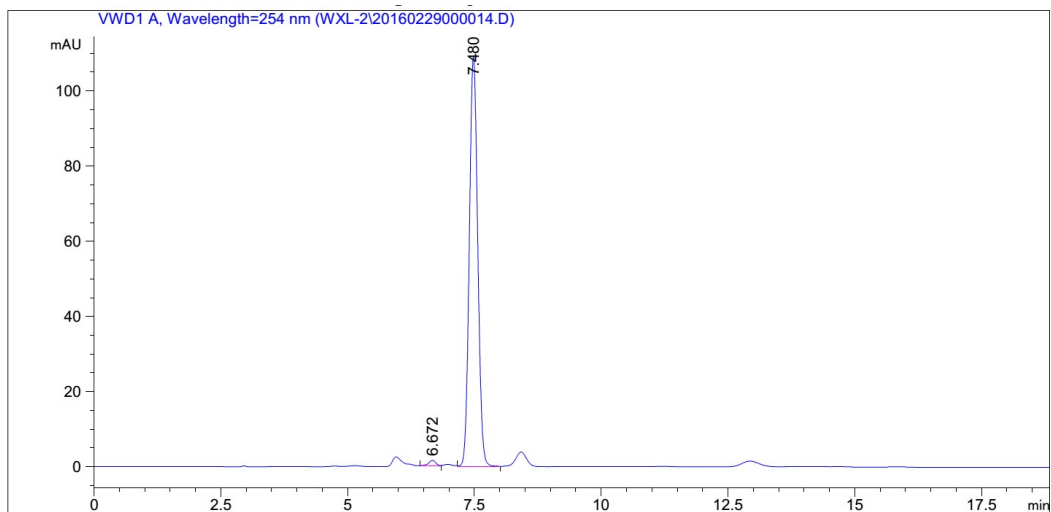

=====  
Area Percent Report  
=====

Sorted By : Signal  
Multiplier: : 1.0000  
Dilution: : 1.0000  
Use Multiplier & Dilution Factor with ISTDs

Signal 1: VWD1 A, Wavelength=254 nm

| Peak # | RetTime [min] | Type | Width [min] | Area [mAU*s] | Height [mAU] | Area %  |
|--------|---------------|------|-------------|--------------|--------------|---------|
| 1      | 6.672         | MM   | 0.1633      | 14.30629     | 1.46009      | 1.1286  |
| 2      | 7.480         | VB   | 0.1797      | 1253.34546   | 108.95834    | 98.8714 |

Totals : 1267.65175 110.41843

=====  
\*\*\* End of Report \*\*\*

# <sup>1</sup>H NMR Spectra of **3ea**

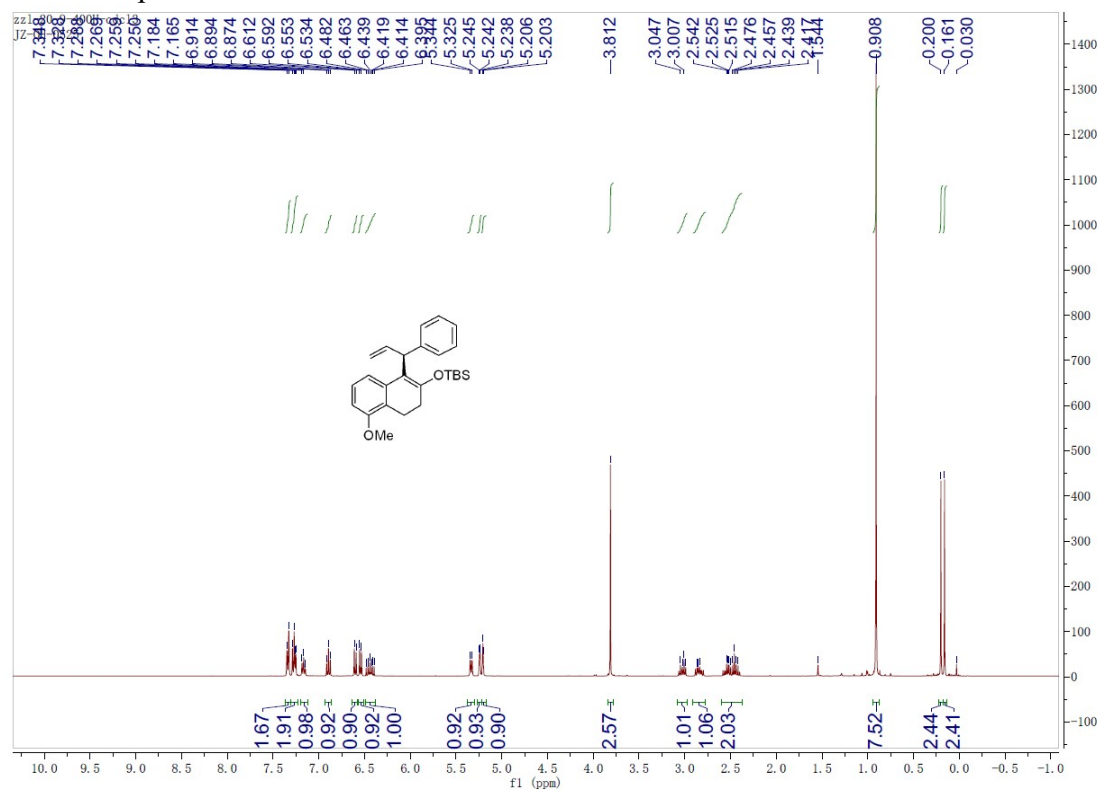

# <sup>13</sup>C NMR Spectra of **3ea**

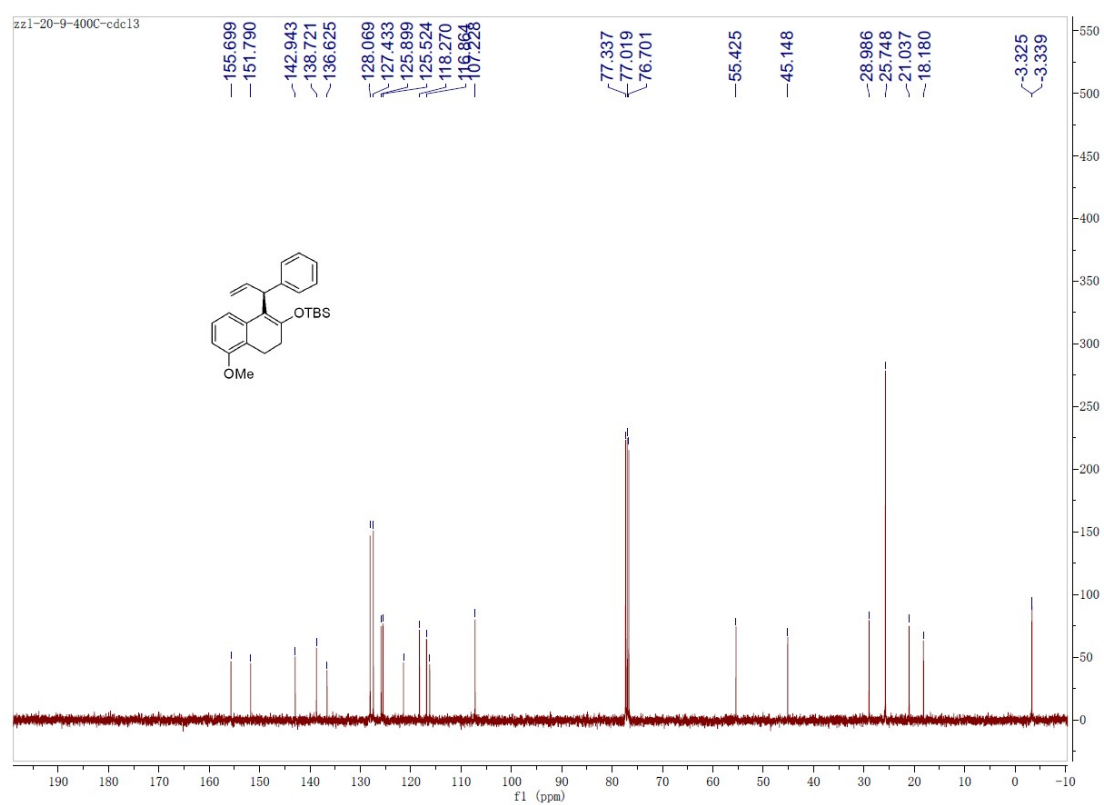

# HPLC Chromatograph of 3ea

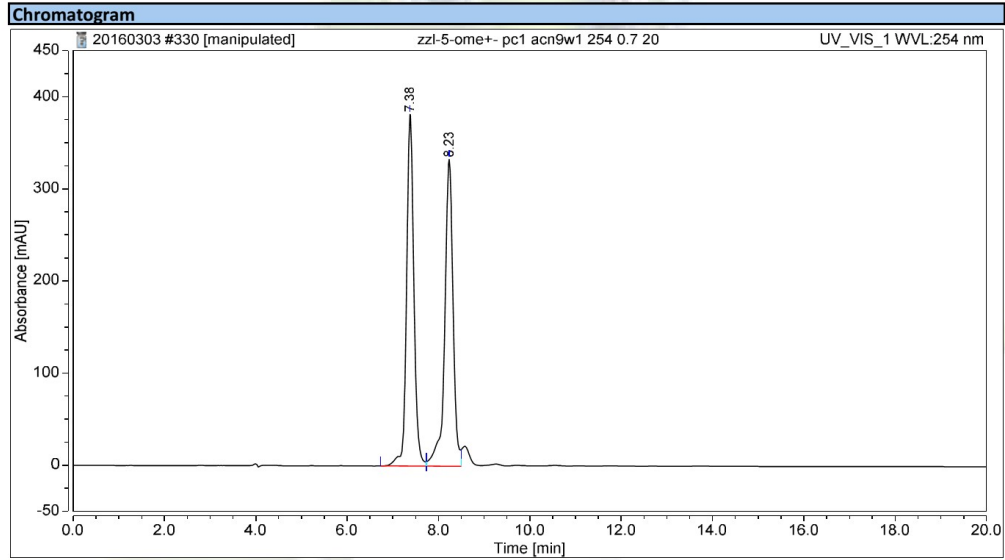

| Integration Results |                       |                 |               |                    |
|---------------------|-----------------------|-----------------|---------------|--------------------|
| No.                 | Retention Time<br>min | Area<br>mAU*min | Height<br>mAU | Relative Area<br>% |
| 1                   | 7.377                 | 70.375          | 381.693       | 49.91              |
| 2                   | 8.233                 | 70.628          | 332.905       | 50.09              |
| Total:              |                       | 141.003         | 714.598       | 100.00             |

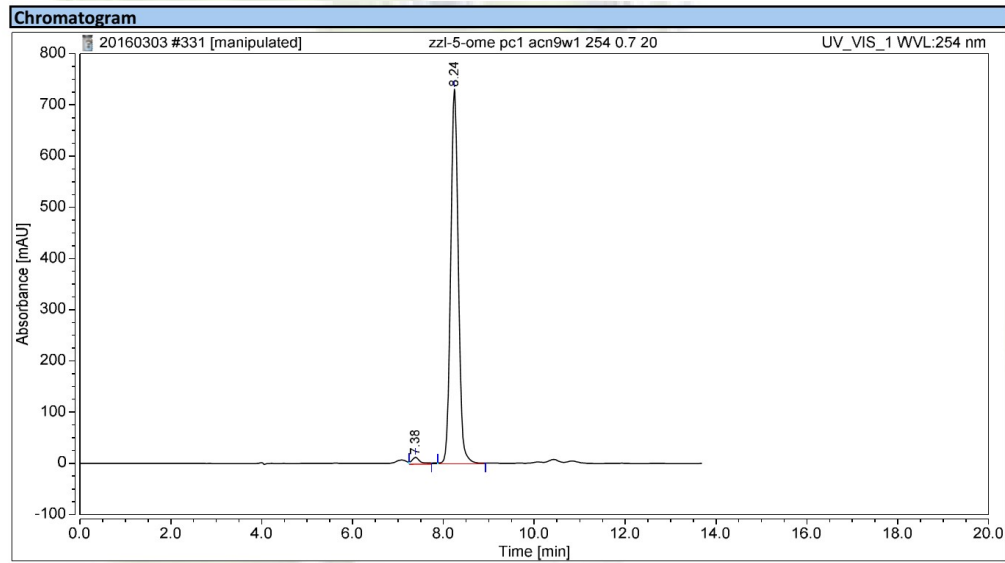

| Integration Results |                       |                 |               |                    |
|---------------------|-----------------------|-----------------|---------------|--------------------|
| No.                 | Retention Time<br>min | Area<br>mAU*min | Height<br>mAU | Relative Area<br>% |
| 1                   | 7.383                 | 2.994           | 13.627        | 2.06               |
| 2                   | 8.240                 | 142.666         | 732.048       | 97.94              |
| Total:              |                       | 145.660         | 745.675       | 100.00             |



# <sup>1</sup>H NMR Spectra of **5aa**

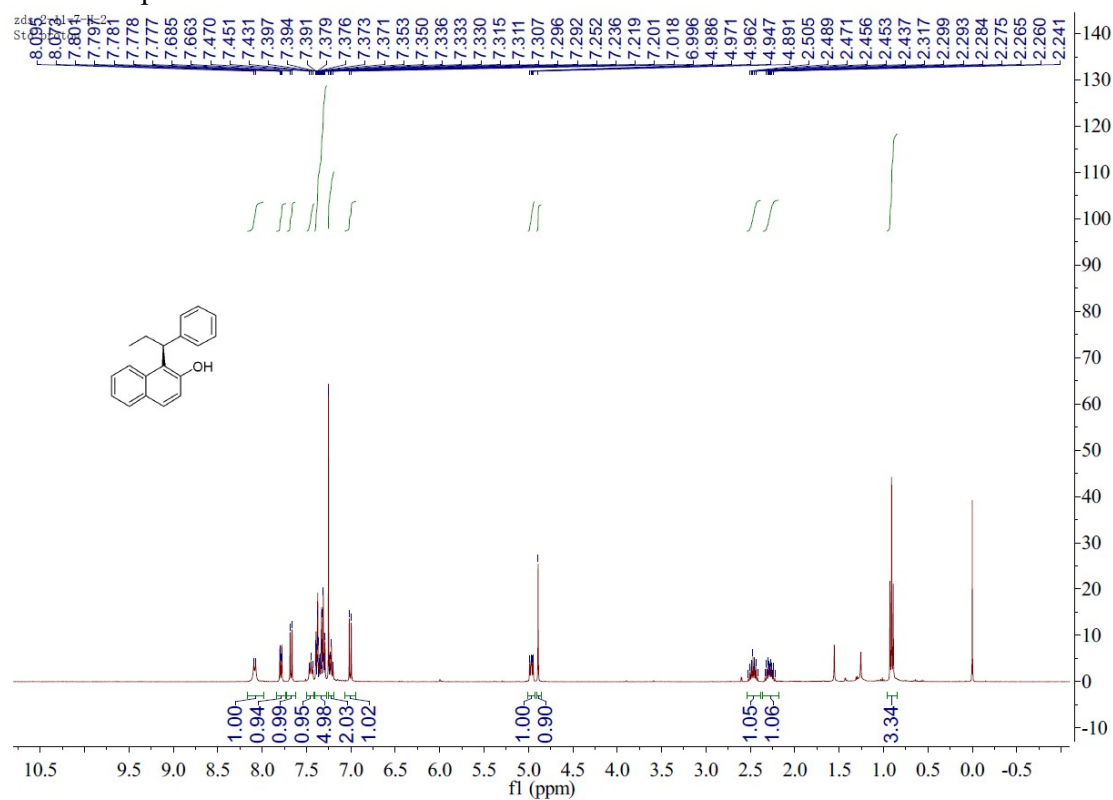

# <sup>13</sup>C NMR Spectrum of **5aa**

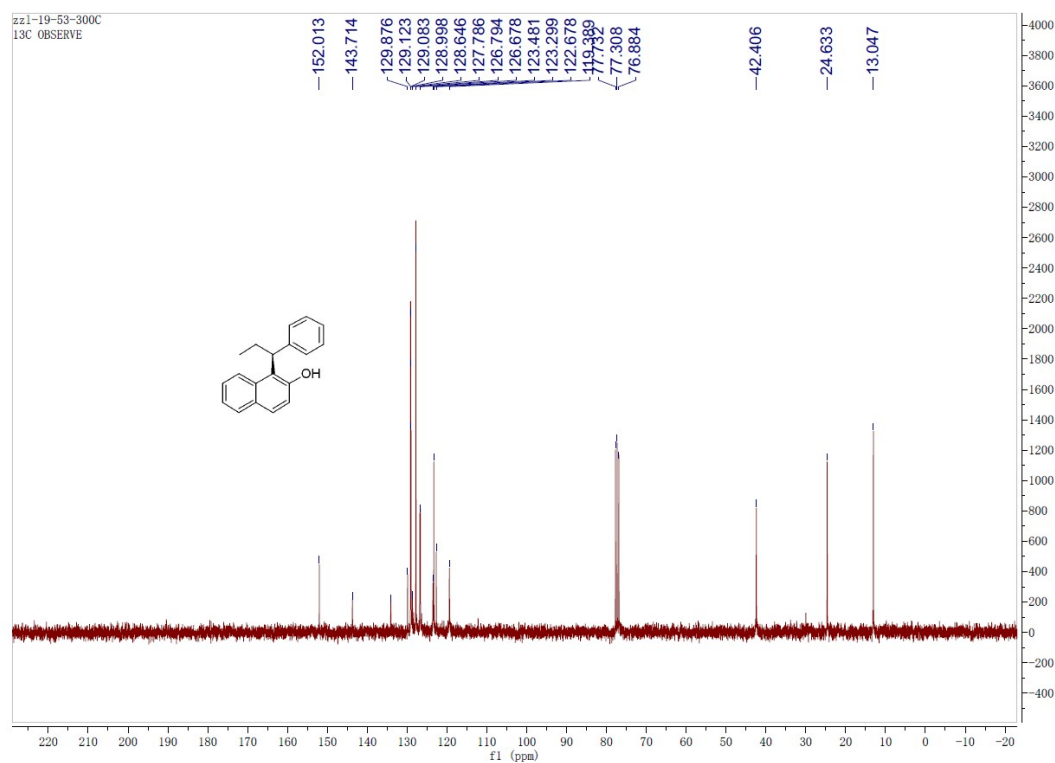

# HPLC Chromatograph of 5aa

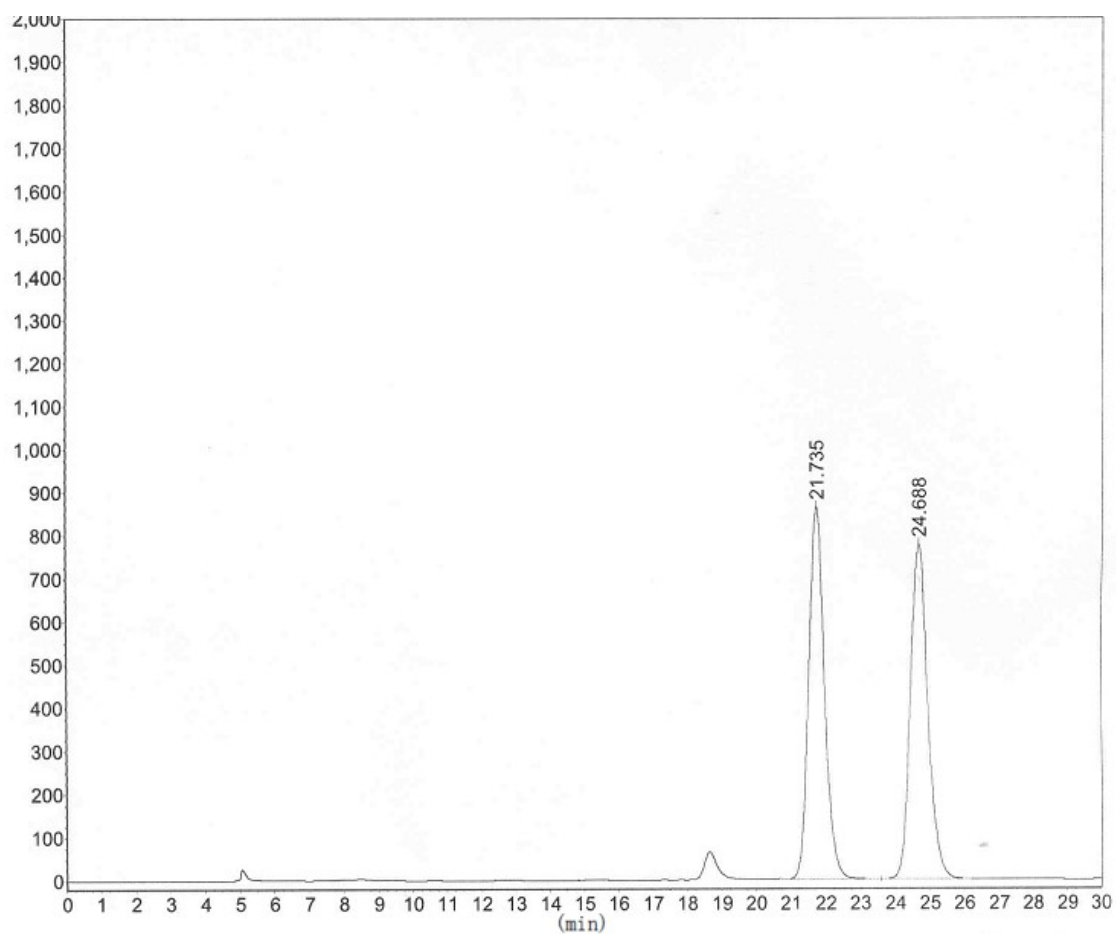

| Peak No.     | R. Time | Peak Height | Peak Area    | Percent  |
|--------------|---------|-------------|--------------|----------|
| 1            | 21.735  | 866498.188  | 27373732.000 | 50.1438  |
| 2            | 24.688  | 777935.250  | 27216754.000 | 49.8562  |
| <b>Total</b> |         | 1644433.438 | 54590486.000 | 100.0000 |

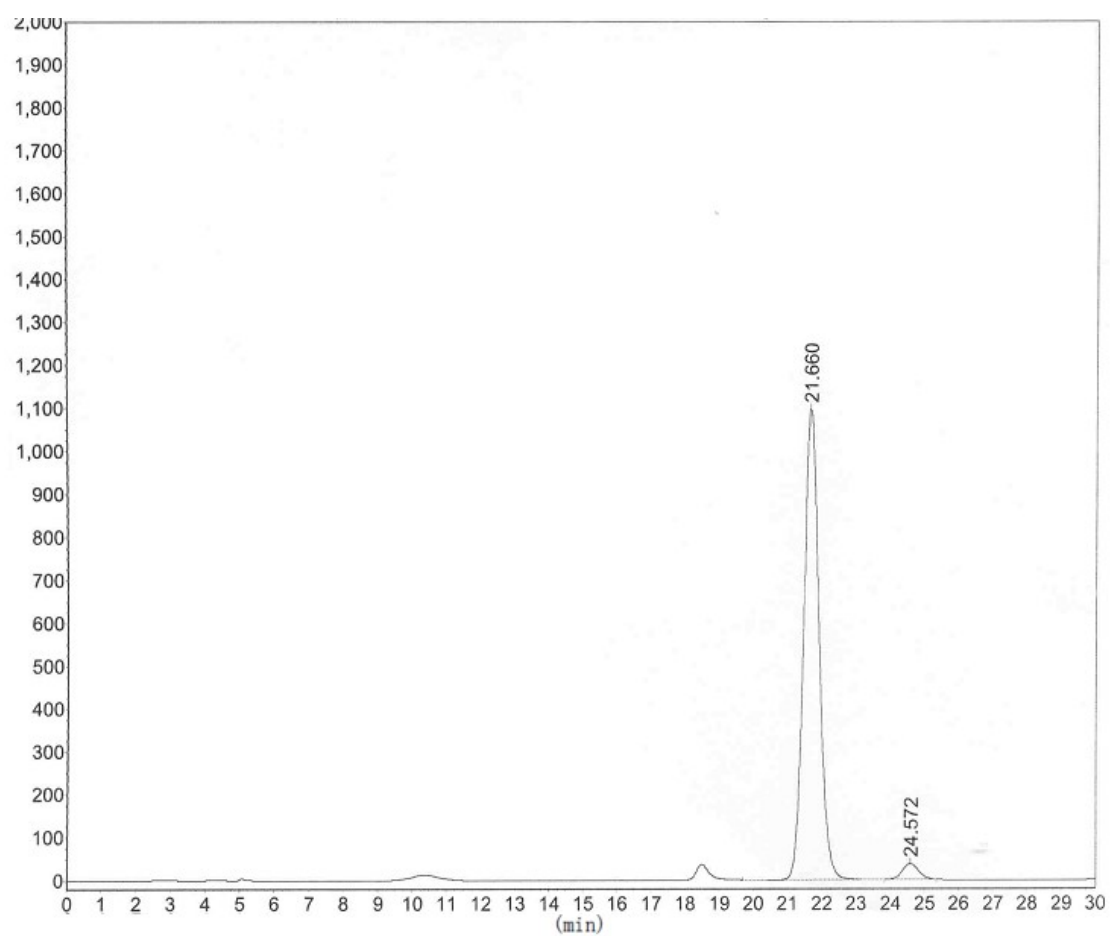

| Peak No.     | R. Time | Peak Height | Peak Area    | Percent  |
|--------------|---------|-------------|--------------|----------|
| 1            | 21.660  | 1097043.750 | 34004288.000 | 96.6084  |
| 2            | 24.572  | 36563.223   | 1193778.500  | 3.3916   |
| <b>Total</b> |         | 1133606.973 | 35198066.500 | 100.0000 |
